# Supplementary material for: WITHDRAWN: New Sesquiterpenoids with Hypolipidemic Activities from An Edible-medicinal Fungi Irpex lacteus
Source: Research Square preprint supplement (doi:10.21203/rs.3.rs-3035658/v1), 2023-06-14
Supplement: Supplementary file 1 [file edb200b7571a4142d93b98f8.pdf]

## **Supporting Information**

### **New Sesquiterpenoids with Hypolipidemic Activities from An Edible-medicinal Fungi *Irpex lacteus***

## Contents

|                                                                                                     |    |
|-----------------------------------------------------------------------------------------------------|----|
| <b>Figure S1</b> <sup>1</sup> H NMR spectrum (400 MHz) of compound <b>1</b> in Chloroform-d .....   | 5  |
| <b>Figure S2</b> <sup>13</sup> C NMR spectrum (400 MHz) of compound <b>1</b> in Chloroform-d .....  | 5  |
| <b>Figure S3</b> HSQC spectrum (400 MHz) of compound <b>1</b> in Chloroform-d .....                 | 6  |
| <b>Figure S4</b> HMBC spectrum (400 MHz) of compound <b>1</b> in Chloroform-d .....                 | 6  |
| <b>Figure S5</b> COSY spectrum (400 MHz) of compound <b>1</b> in Chloroform-d .....                 | 7  |
| <b>Figure S6</b> NOESY spectrum (400 MHz) of compound <b>1</b> in Chloroform-d .....                | 7  |
| <b>Figure S7</b> HRESIMS spectrum of compound <b>1</b> .....                                        | 8  |
| <b>Figure S8</b> IR spectrum of compound <b>1</b> .....                                             | 8  |
| <b>Figure S9</b> UV spectrum of compound <b>1</b> .....                                             | 8  |
| <b>Figure S10</b> <sup>1</sup> H NMR spectrum (400 MHz) of compound <b>2</b> in Chloroform-d .....  | 9  |
| <b>Figure S11</b> <sup>13</sup> C NMR spectrum (400 MHz) of compound <b>2</b> in Chloroform-d ..... | 9  |
| <b>Figure S12</b> HSQC spectrum (400 MHz) of compound <b>2</b> in Chloroform-d .....                | 10 |
| <b>Figure S13</b> HMBC spectrum (400 MHz) of compound <b>2</b> in Chloroform-d .....                | 10 |
| <b>Figure S14</b> COSY spectrum (400 MHz) of compound <b>2</b> in Chloroform-d .....                | 11 |
| <b>Figure S15</b> NOESY spectrum (400 MHz) of compound <b>2</b> in Chloroform-d .....               | 11 |
| <b>Figure S16</b> HRESIMS spectrum of compound <b>2</b> .....                                       | 12 |
| <b>Figure S17</b> IR spectrum of compound <b>2</b> .....                                            | 12 |
| <b>Figure S18</b> UV spectrum of compound <b>2</b> .....                                            | 12 |
| <b>Figure S19</b> <sup>1</sup> H NMR spectrum (400 MHz) of compound <b>3</b> in Chloroform-d ....   | 13 |
| <b>Figure S20</b> <sup>13</sup> C NMR spectrum (400 MHz) of compound <b>3</b> in Chloroform-d ...   | 13 |
| <b>Figure S21</b> HSQC spectrum (400 MHz) of compound <b>3</b> in Chloroform-d .....                | 14 |
| <b>Figure S22</b> HMBC spectrum (400 MHz) of compound <b>3</b> in Chloroform-d .....                | 14 |
| <b>Figure S23</b> COSY spectrum (400 MHz) of compound <b>3</b> in Chloroform-d .....                | 15 |
| <b>Figure S24</b> NOESY spectrum (400 MHz) of compound <b>3</b> in Chloroform-d ....                | 15 |
| <b>Figure S25</b> HRESIMS spectrum of compound <b>3</b> .....                                       | 16 |
| <b>Figure S26</b> IR spectrum of compound <b>3</b> .....                                            | 16 |
| <b>Figure S27</b> UV spectrum of compound <b>3</b> .....                                            | 16 |
| <b>Figure S28</b> <sup>1</sup> H NMR spectrum (400 MHz) of compound <b>4</b> in Chloroform-d ....   | 17 |
| <b>Figure S29</b> <sup>13</sup> C NMR spectrum (400 MHz) of compound <b>4</b> in Chloroform-d ...   | 17 |
| <b>Figure S30</b> HSQC spectrum (400 MHz) of compound <b>4</b> in Chloroform-d .....                | 18 |
| <b>Figure S31</b> HMBC spectrum (400 MHz) of compound <b>4</b> in Chloroform-d .....                | 18 |
| <b>Figure S32</b> COSY spectrum (400 MHz) of compound <b>4</b> in Chloroform-d .....                | 19 |
| <b>Figure S33</b> NOESY spectrum (400 MHz) of compound <b>4</b> in Chloroform-d ....                | 19 |

|                                                                                                   |    |
|---------------------------------------------------------------------------------------------------|----|
| <b>Figure S34</b> HRESIMS spectrum of compound <b>4</b> .....                                     | 20 |
| <b>Figure S35</b> IR spectrum of compound <b>4</b> .....                                          | 20 |
| <b>Figure S36</b> UV spectrum of compound <b>4</b> .....                                          | 20 |
| <b>Figure S37</b> <sup>1</sup> H NMR spectrum (400 MHz) of compound <b>5</b> in Chloroform-d .... | 21 |
| <b>Figure S38</b> <sup>13</sup> C NMR spectrum (400 MHz) of compound <b>5</b> in Chloroform-d ... | 21 |
| <b>Figure S39</b> HSQC spectrum (400 MHz) of compound <b>5</b> in Chloroform-d .....              | 22 |
| <b>Figure S40</b> HMBC spectrum (400 MHz) of compound <b>5</b> in Chloroform-d .....              | 22 |
| <b>Figure S41</b> COSY spectrum (400 MHz) of compound <b>5</b> in Chloroform-d .....              | 23 |
| <b>Figure S42</b> NOESY spectrum (400 MHz) of compound <b>5</b> in Chloroform-d .....             | 23 |
| <b>Figure S43</b> HRESIMS spectrum of compound <b>5</b> .....                                     | 24 |
| <b>Figure S44</b> IR spectrum of compound <b>5</b> .....                                          | 24 |
| <b>Figure S45</b> UV spectrum of compound <b>5</b> .....                                          | 24 |
| <b>Figure S46</b> <sup>1</sup> H NMR spectrum (400 MHz) of compound <b>6</b> in Chloroform-d .... | 25 |
| <b>Figure S47</b> <sup>13</sup> C NMR spectrum (400 MHz) of compound <b>6</b> in Chloroform-d ... | 25 |
| <b>Figure S48</b> HSQC spectrum (400 MHz) of compound <b>6</b> in Chloroform-d .....              | 26 |
| <b>Figure S49</b> HMBC spectrum (400 MHz) of compound <b>6</b> in Chloroform-d .....              | 26 |
| <b>Figure S50</b> COSY spectrum (400 MHz) of compound <b>6</b> in Chloroform-d .....              | 27 |
| <b>Figure S51</b> NOESY spectrum (400 MHz) of compound <b>6</b> in Chloroform-d .....             | 27 |
| <b>Figure S52</b> HRESIMS spectrum of compound <b>6</b> .....                                     | 28 |
| <b>Figure S53</b> IR spectrum of compound <b>6</b> .....                                          | 28 |
| <b>Figure S54</b> UV spectrum of compound <b>6</b> .....                                          | 28 |
| <b>Figure S55</b> <sup>1</sup> H NMR spectrum (400 MHz) of compound <b>7</b> in Chloroform-d .... | 29 |
| <b>Figure S56</b> <sup>13</sup> C NMR spectrum (400 MHz) of compound <b>7</b> in Chloroform-d ... | 29 |
| <b>Figure S57</b> HSQC spectrum (400 MHz) of compound <b>7</b> in Chloroform-d .....              | 30 |
| <b>Figure S58</b> HMBC spectrum (400 MHz) of compound <b>7</b> in Chloroform-d .....              | 30 |
| <b>Figure S59</b> COSY spectrum (400 MHz) of compound <b>7</b> in Chloroform-d .....              | 31 |
| <b>Figure S60</b> NOESY spectrum (400 MHz) of compound <b>7</b> in Chloroform-d .....             | 31 |
| <b>Figure S61</b> HRESIMS spectrum of compound <b>7</b> .....                                     | 32 |
| <b>Figure S62</b> IR spectrum of compound <b>7</b> .....                                          | 32 |
| <b>Figure S63</b> UV spectrum of compound <b>7</b> .....                                          | 32 |
| <b>Figure S64</b> <sup>1</sup> H NMR spectrum (400 MHz) of compound <b>8</b> in Chloroform-d .... | 33 |
| <b>Figure S65</b> <sup>13</sup> C spectrum (400 MHz) of compound <b>8</b> in Chloroform-d .....   | 33 |
| <b>Figure S66</b> HSQC spectrum (400 MHz) of compound <b>8</b> in Chloroform-d .....              | 34 |
| <b>Figure S67</b> HMBC spectrum (400 MHz) of compound <b>8</b> in Chloroform-d .....              | 34 |

|                                                                                                   |    |
|---------------------------------------------------------------------------------------------------|----|
| <b>Figure S68</b> COSY spectrum (400 MHz) of compound <b>8</b> in Chloroform-d .....              | 35 |
| <b>Figure S69</b> NOESY spectrum (400 MHz) of compound <b>8</b> in Chloroform-d .....             | 35 |
| <b>Figure S70</b> HRESIMS spectrum of compound <b>8</b> .....                                     | 36 |
| <b>Figure S71</b> IR spectrum of compound <b>8</b> .....                                          | 36 |
| <b>Figure S72</b> UV spectrum of compound <b>8</b> .....                                          | 36 |
| <b>Figure S73</b> $^1\text{H}$ NMR spectrum (400 MHz) of compound <b>9</b> in Chloroform-d ....   | 37 |
| <b>Figure S74</b> $^{13}\text{C}$ NMR spectrum (400 MHz) of compound <b>9</b> in Chloroform-d ... | 37 |
| <b>Figure S75</b> $^1\text{H}$ NMR spectrum (400 MHz) of compound <b>10</b> in Chloroform-d ..    | 38 |
| <b>Figure S76</b> $^{13}\text{C}$ NMR spectrum (400 MHz) of compound <b>10</b> in Chloroform-d .  | 38 |
| <b>Figure S77</b> $^1\text{H}$ NMR spectrum (400 MHz) of compound <b>11</b> in Chloroform-d ..    | 39 |
| <b>Figure S78</b> $^{13}\text{C}$ NMR spectrum (400 MHz) of compound <b>11</b> in Chloroform-d .  | 39 |
| <b>Figure S79</b> $^1\text{H}$ NMR spectrum (400 MHz) of compound <b>12</b> in Chloroform-d ..    | 40 |
| <b>Figure S80</b> $^{13}\text{C}$ NMR spectrum (400 MHz) of compound <b>12</b> in Chloroform-d .  | 40 |

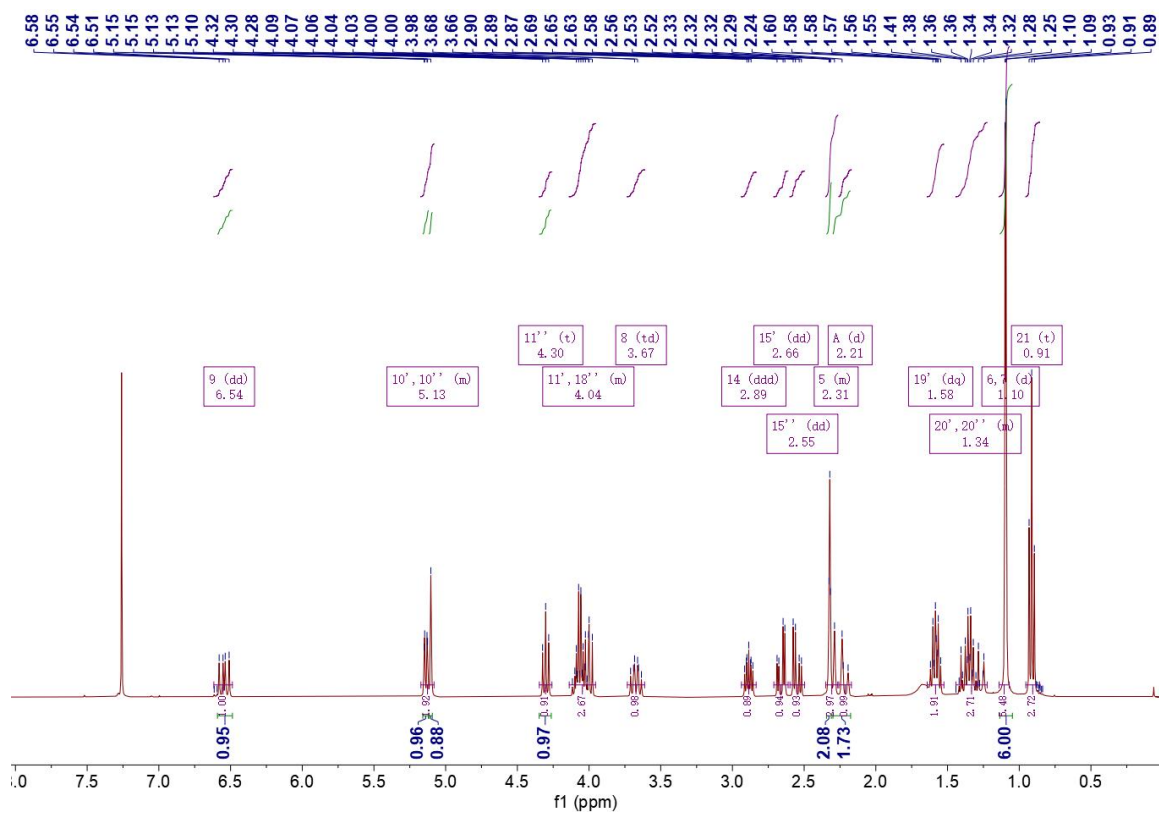

**Figure S1  $^1\text{H}$  NMR spectrum (400 MHz) of compound 1 in Chloroform-d**

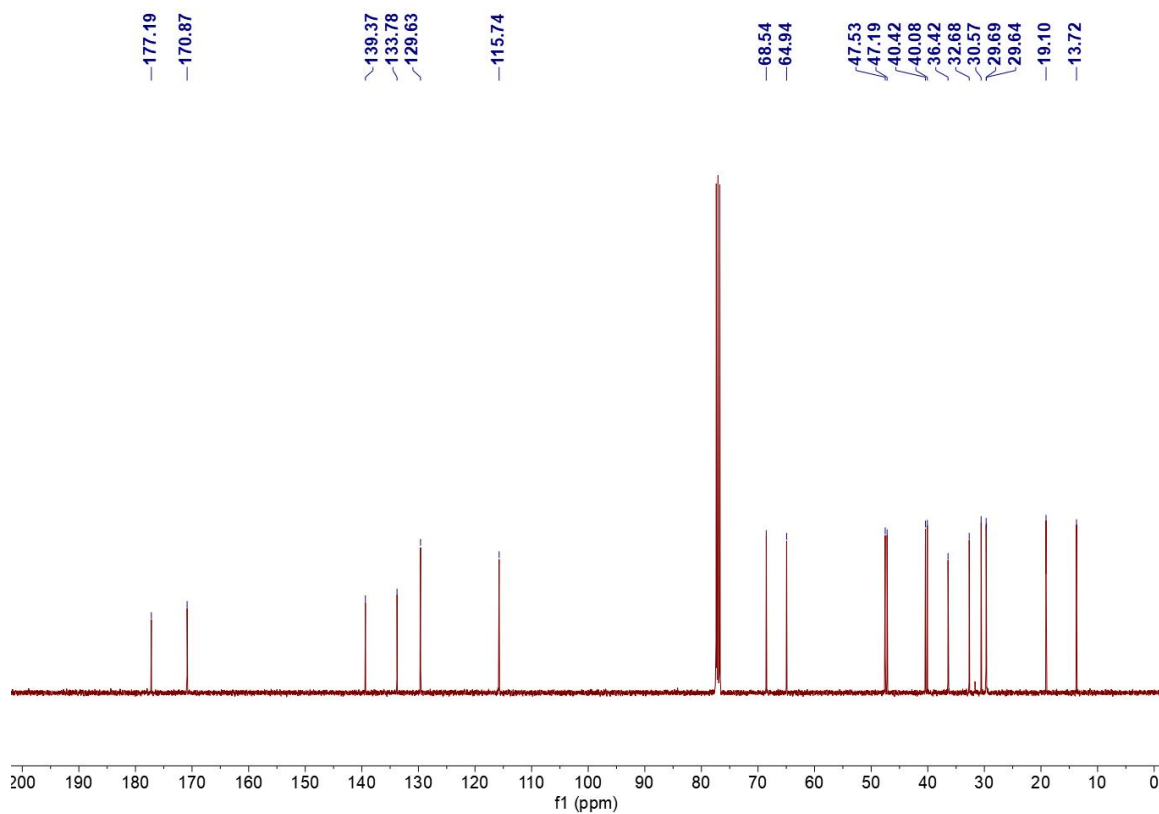

**Figure S2  $^{13}\text{C}$  NMR spectrum (400 MHz) of compound 1 in Chloroform-d**



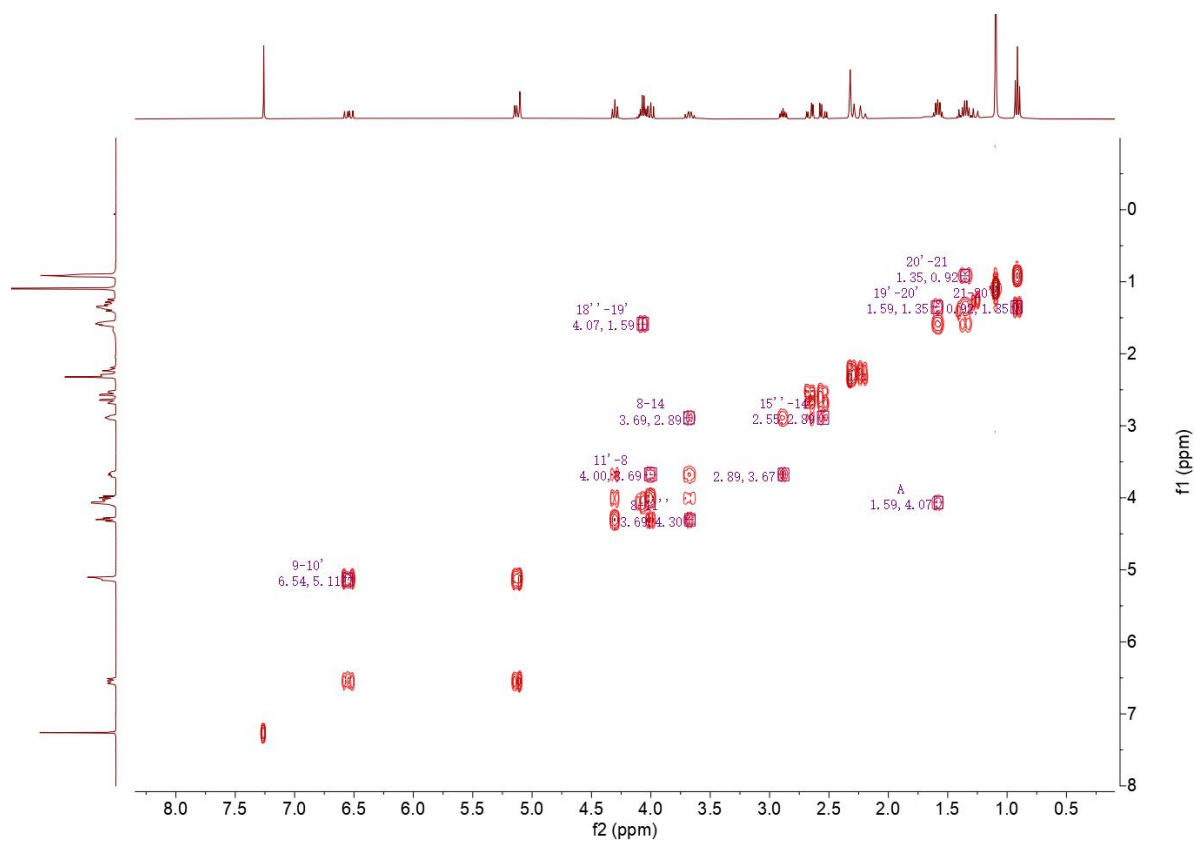

**Figure S5** COSY spectrum (400 MHz) of compound **1** in Chloroform-d

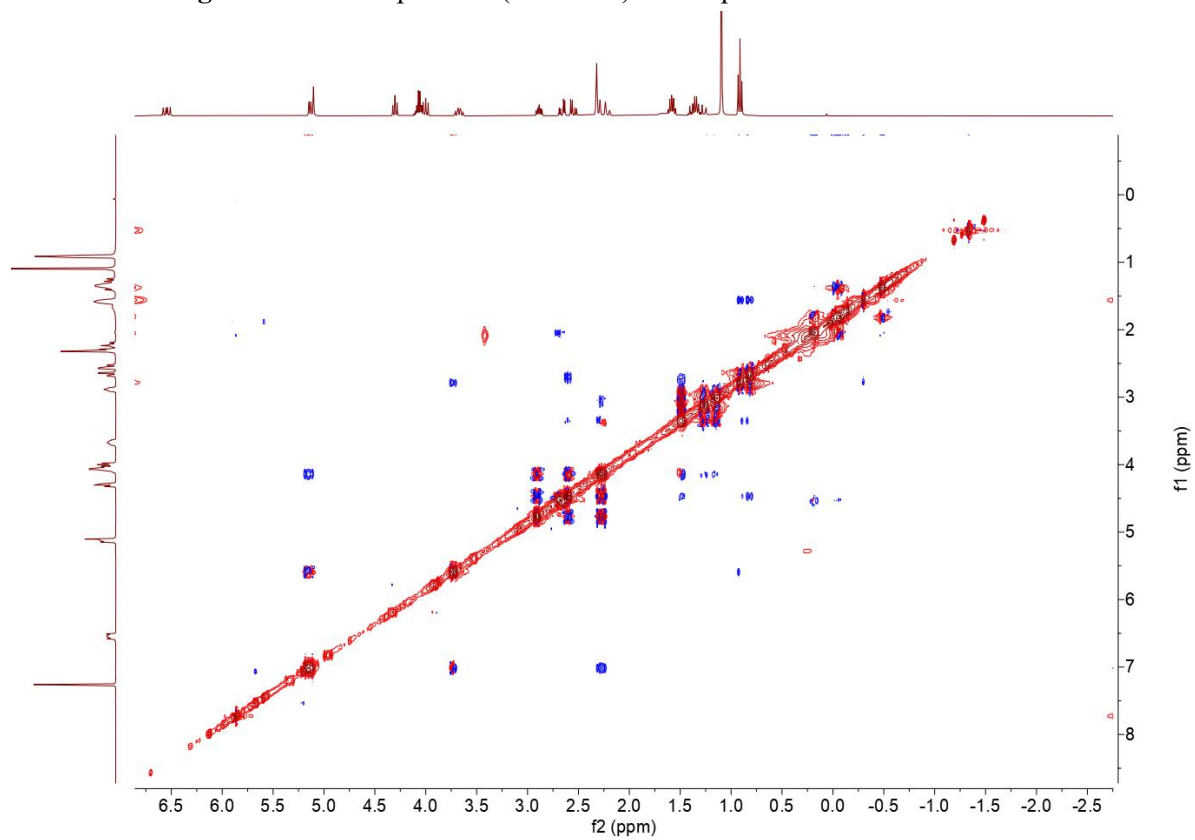

**Figure S6** NOESY spectrum (400 MHz) of compound **1** in Chloroform-d

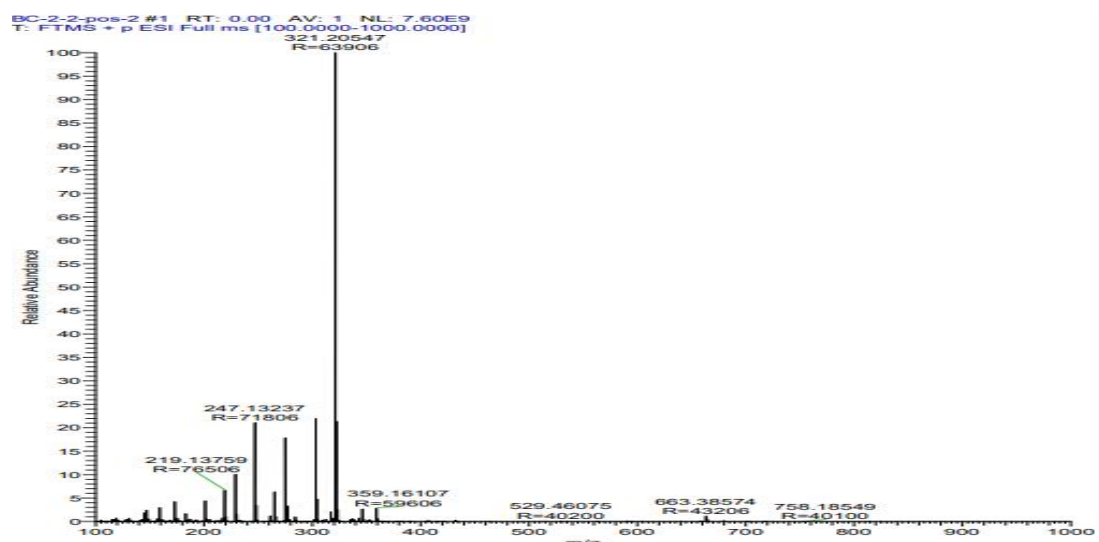

Figure S7 HRESIMS spectrum of compound 1

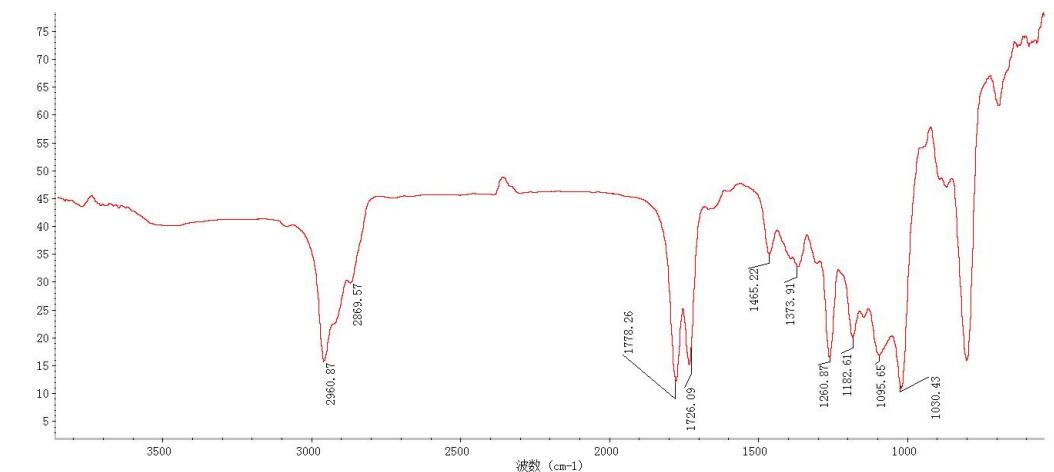

Figure S8 IR spectrum of compound 1

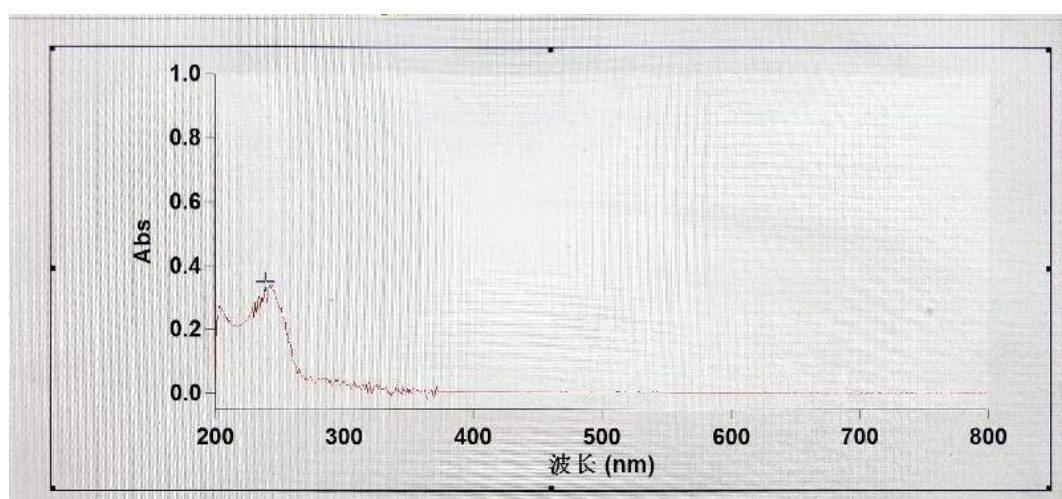

Figure S9 UV spectrum of compound 1

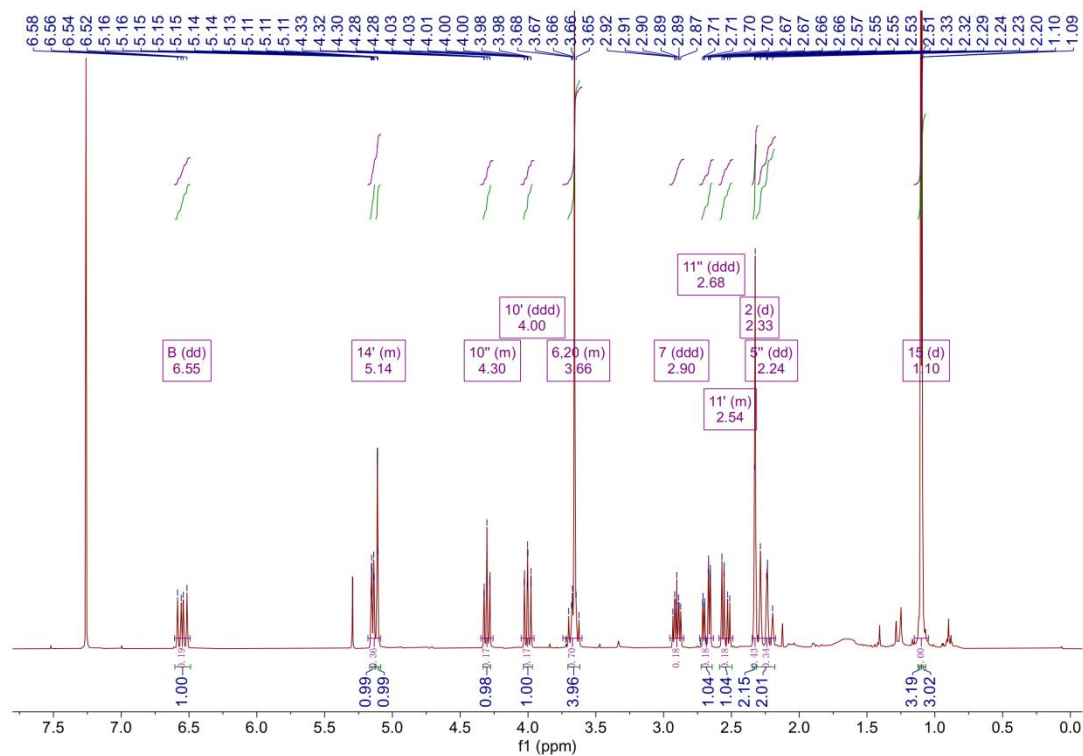

**Figure S10** <sup>1</sup>H NMR spectrum (400 MHz) of compound **2** in Chloroform-d

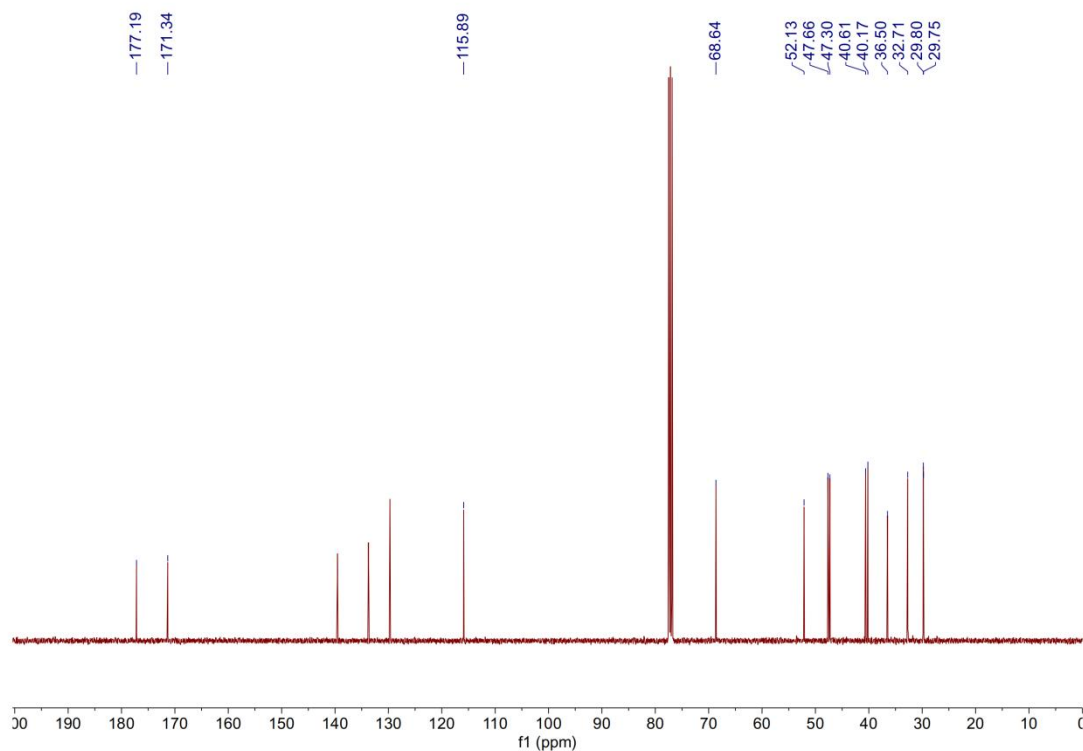

**Figure S11** <sup>13</sup>C NMR spectrum (400 MHz) of compound **2** in Chloroform-d

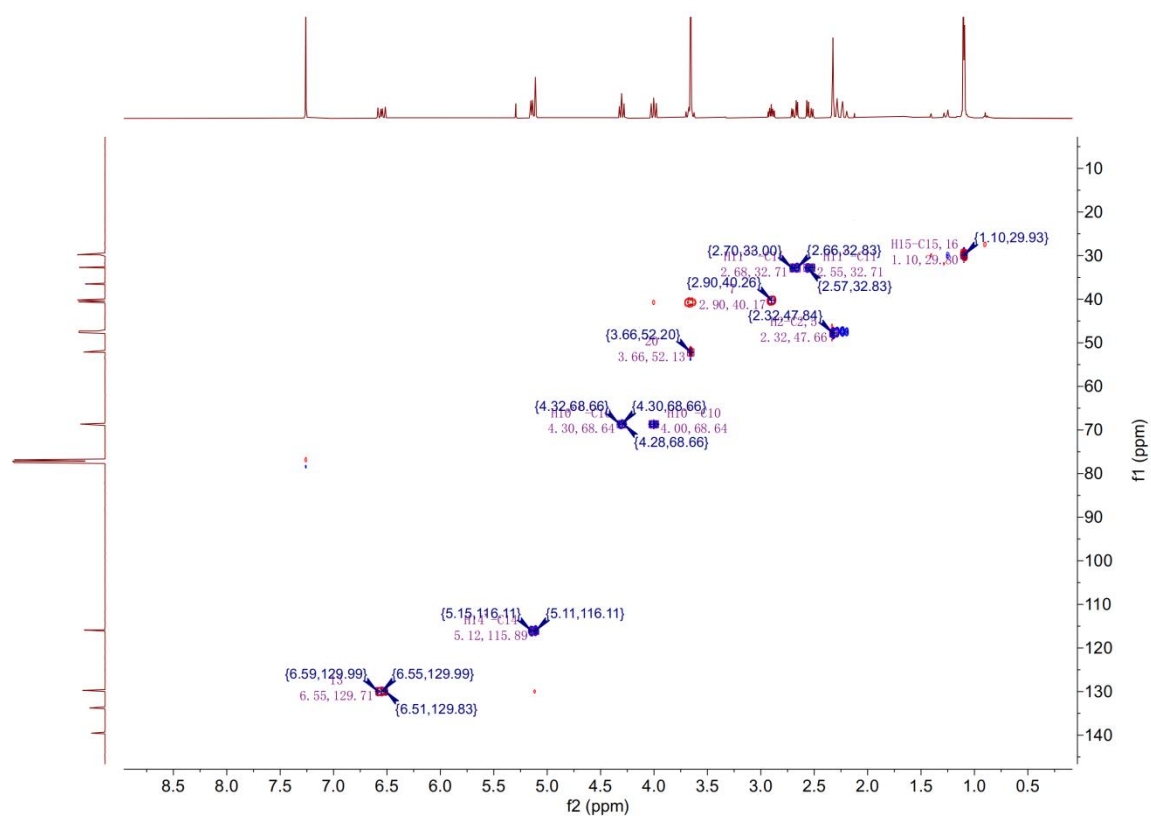

**Figure S12** HSQC spectrum (400 MHz) of compound **2** in Chloroform-d

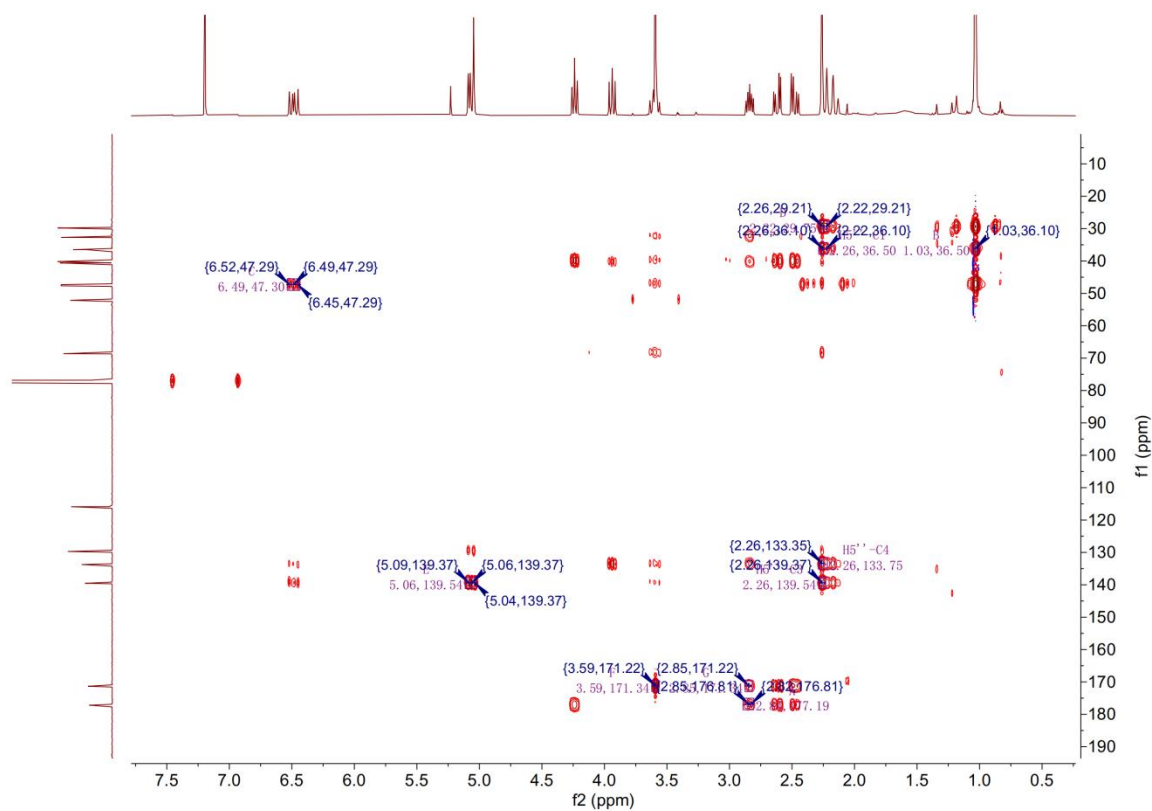

**Figure S13** HMBC spectrum (400 MHz) of compound **2** in Chloroform-d

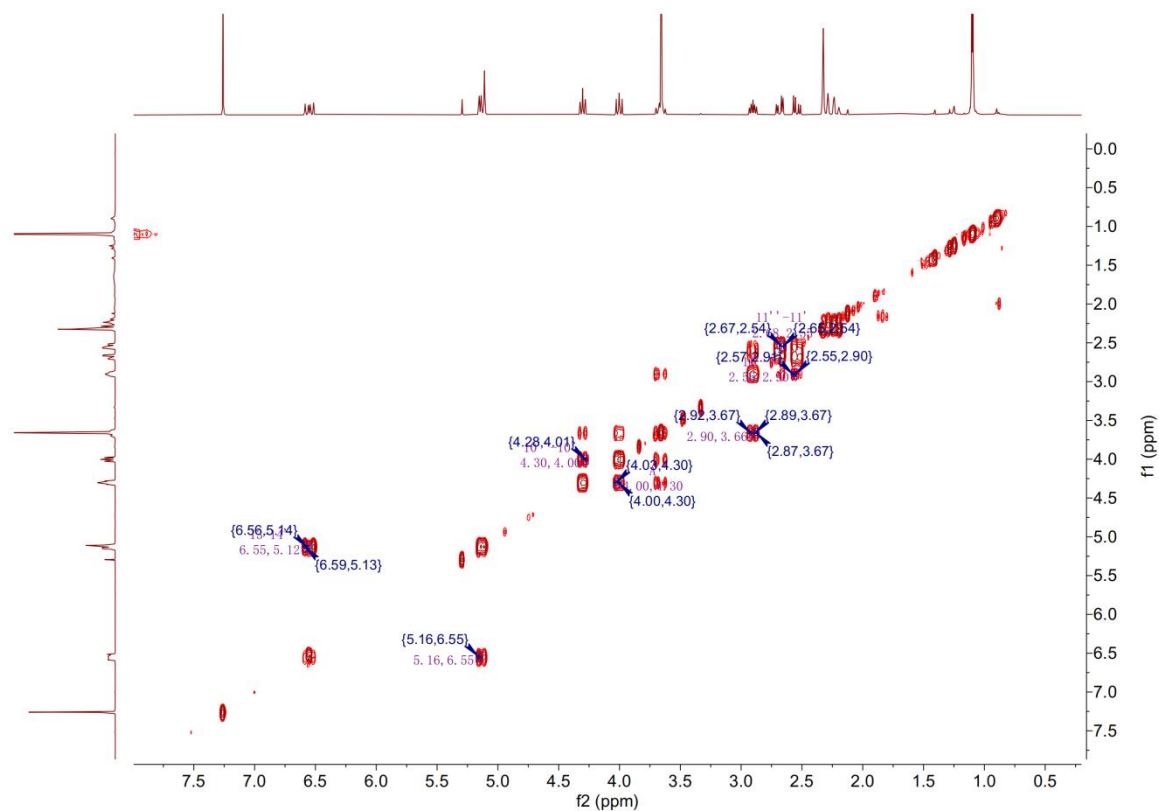

**Figure S14** COSY spectrum (400 MHz) of compound **2** in Chloroform-d

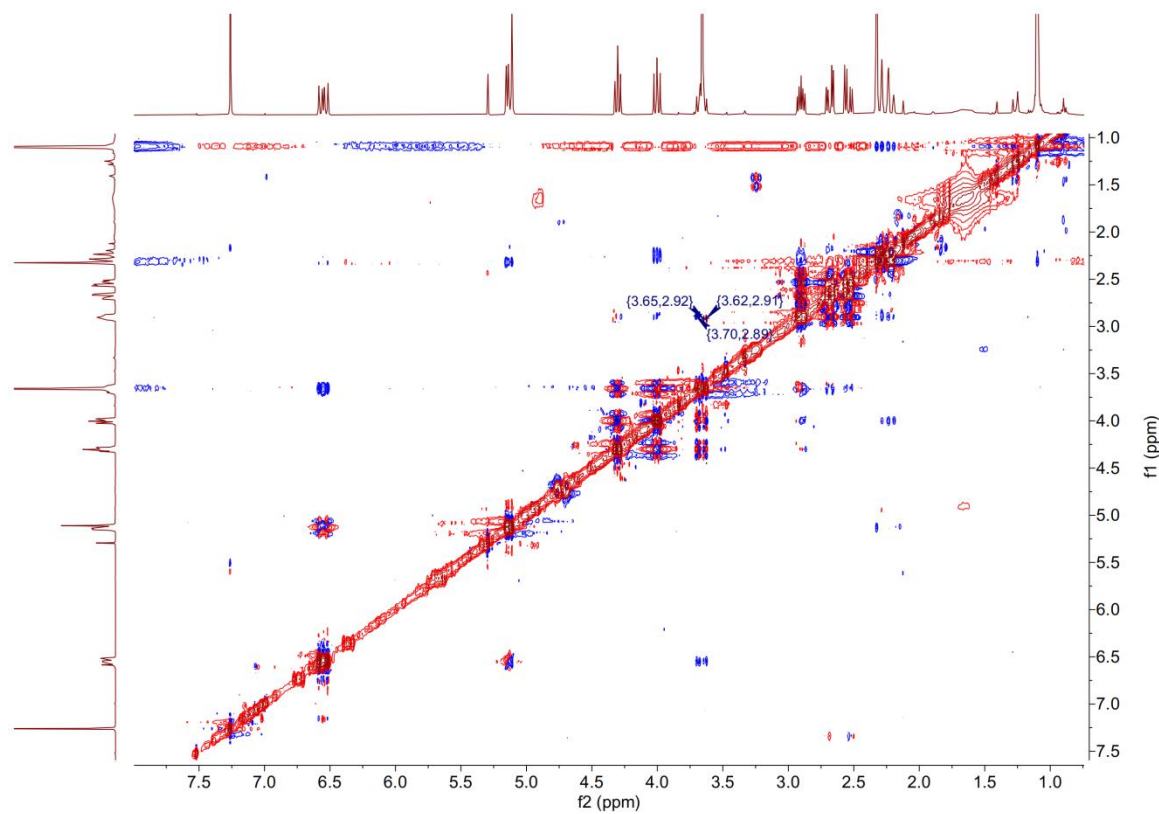

**Figure S15** NOESY spectrum (400 MHz) of compound **2** in Chloroform-d

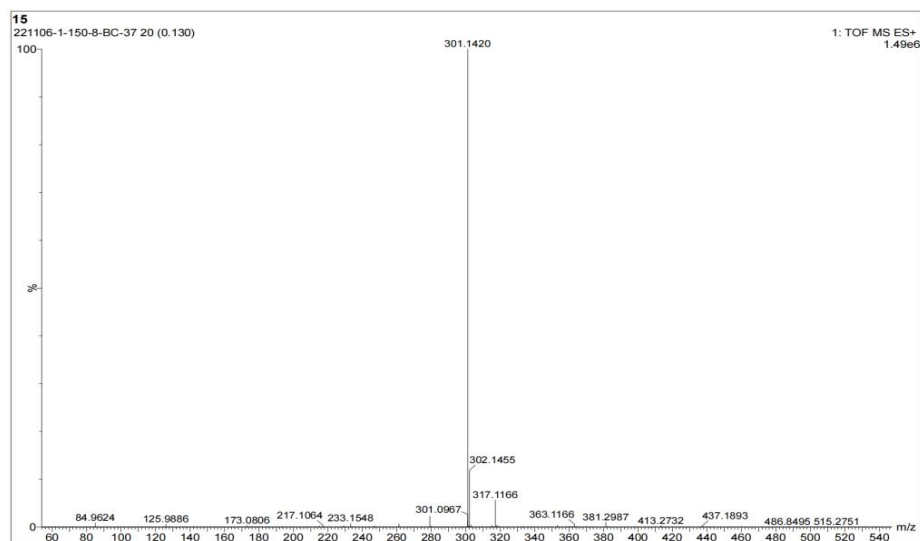

**Figure S16** HRESIMS spectrum of compound **2**

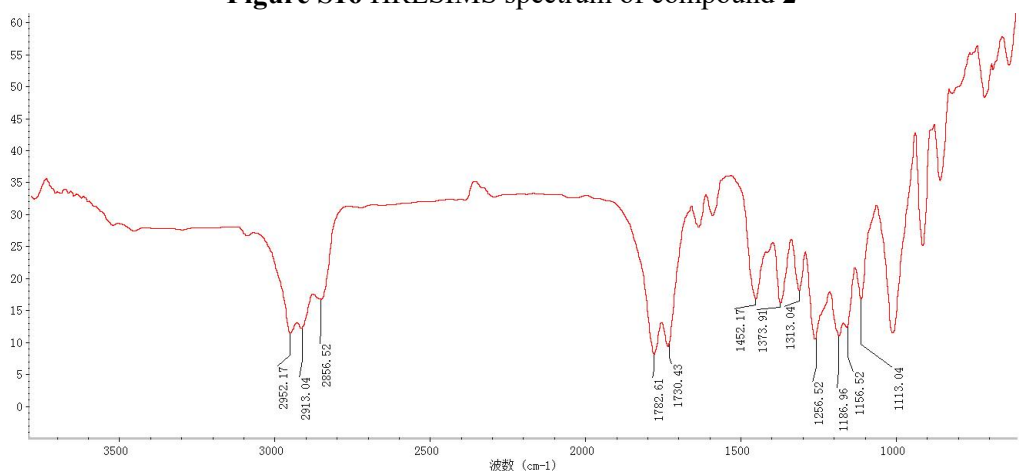

**Figure S17** IR spectrum of compound **2**

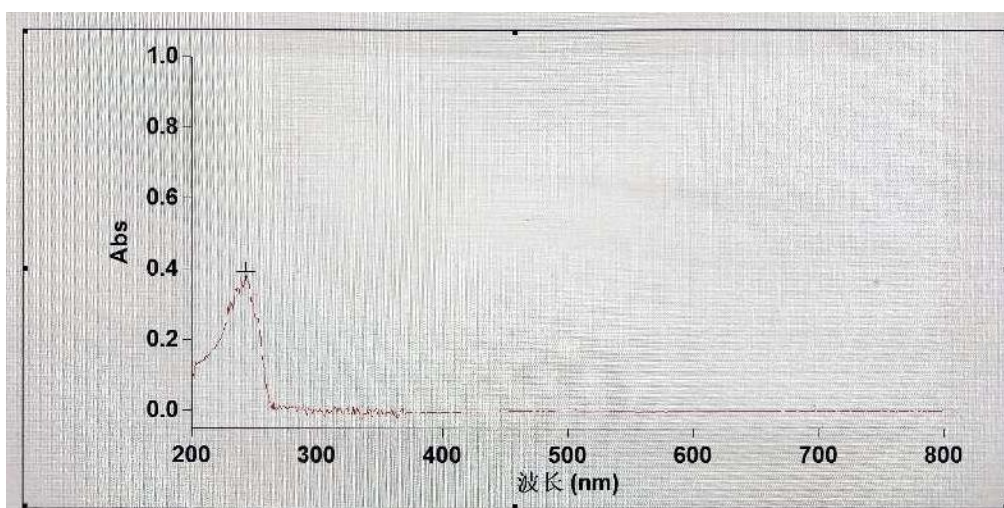

**Figure S18** UV spectrum of compound **2**

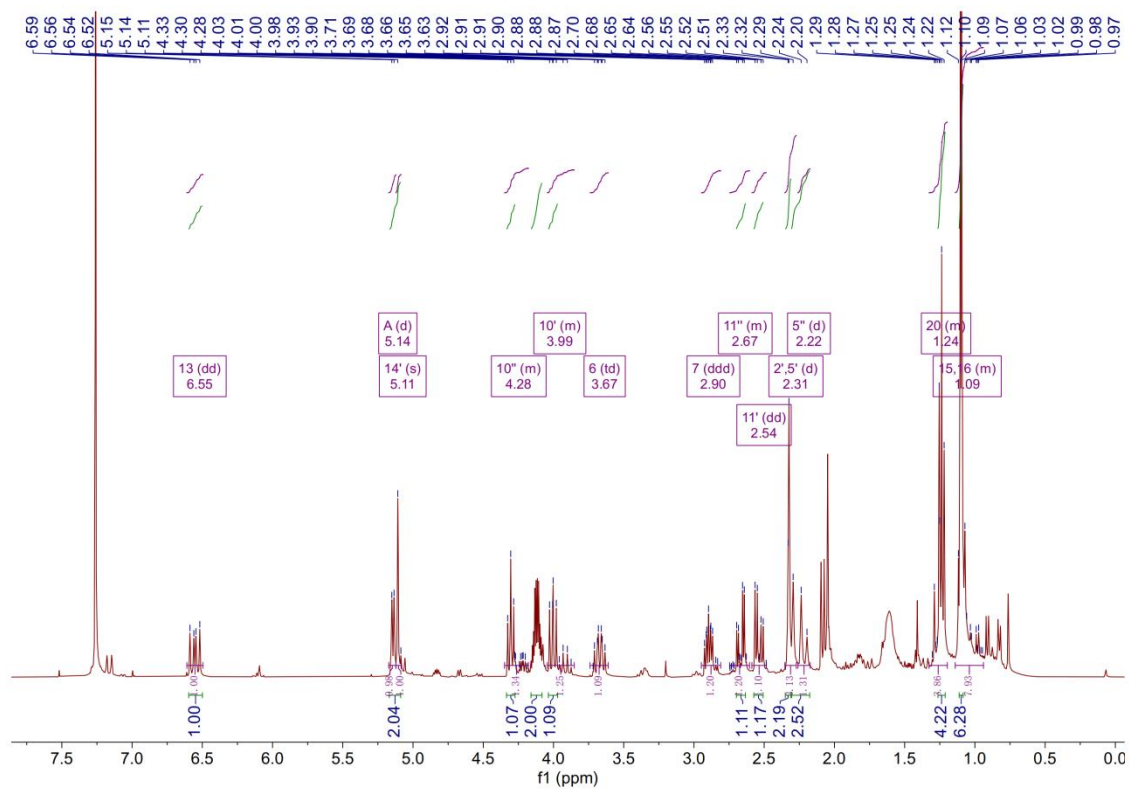

**Figure S19**  $^1\text{H}$  NMR spectrum (400 MHz) of compound **3** in Chloroform- $d$

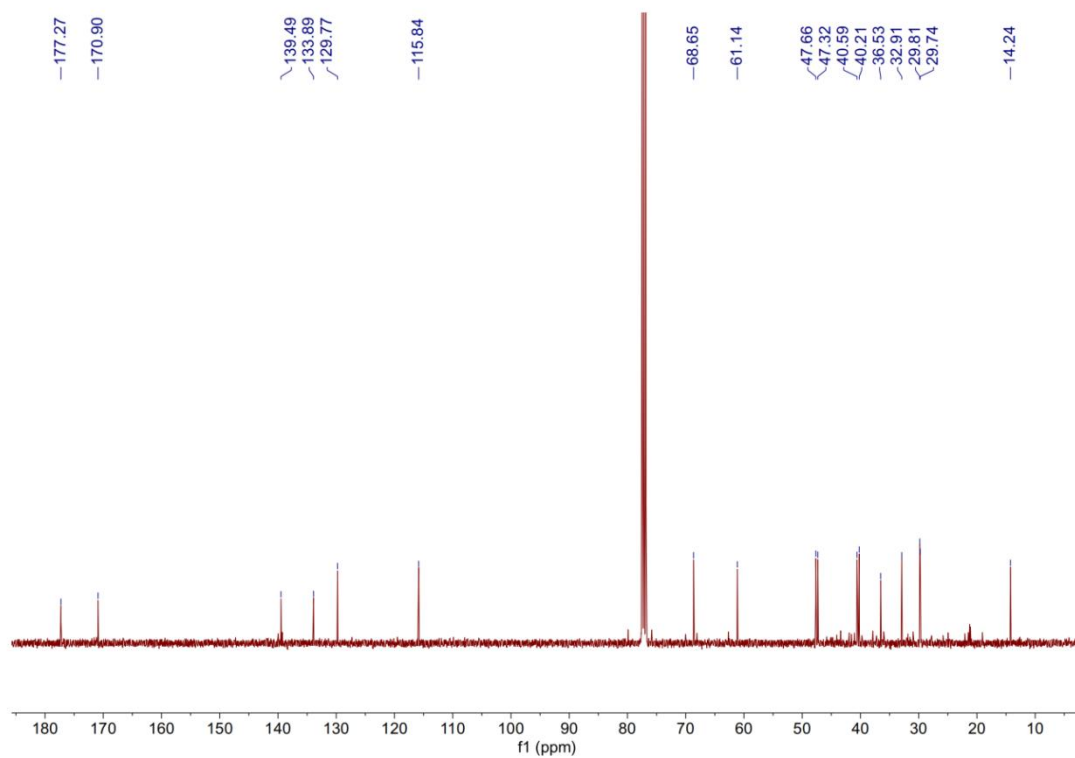

**Figure S20**  $^{13}\text{C}$  NMR spectrum (400 MHz) of compound **3** in Chloroform- $d$

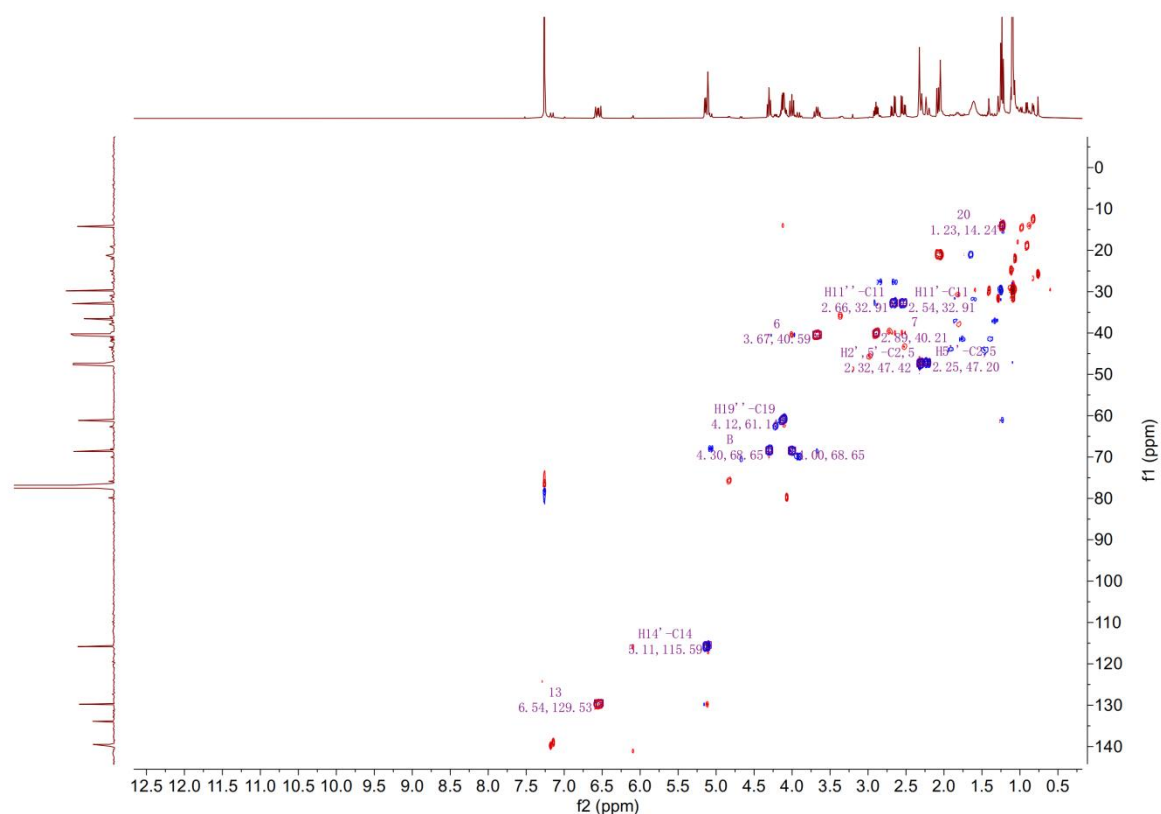

**Figure S21** HSQC spectrum (400 MHz) of compound **3** in Chloroform-d

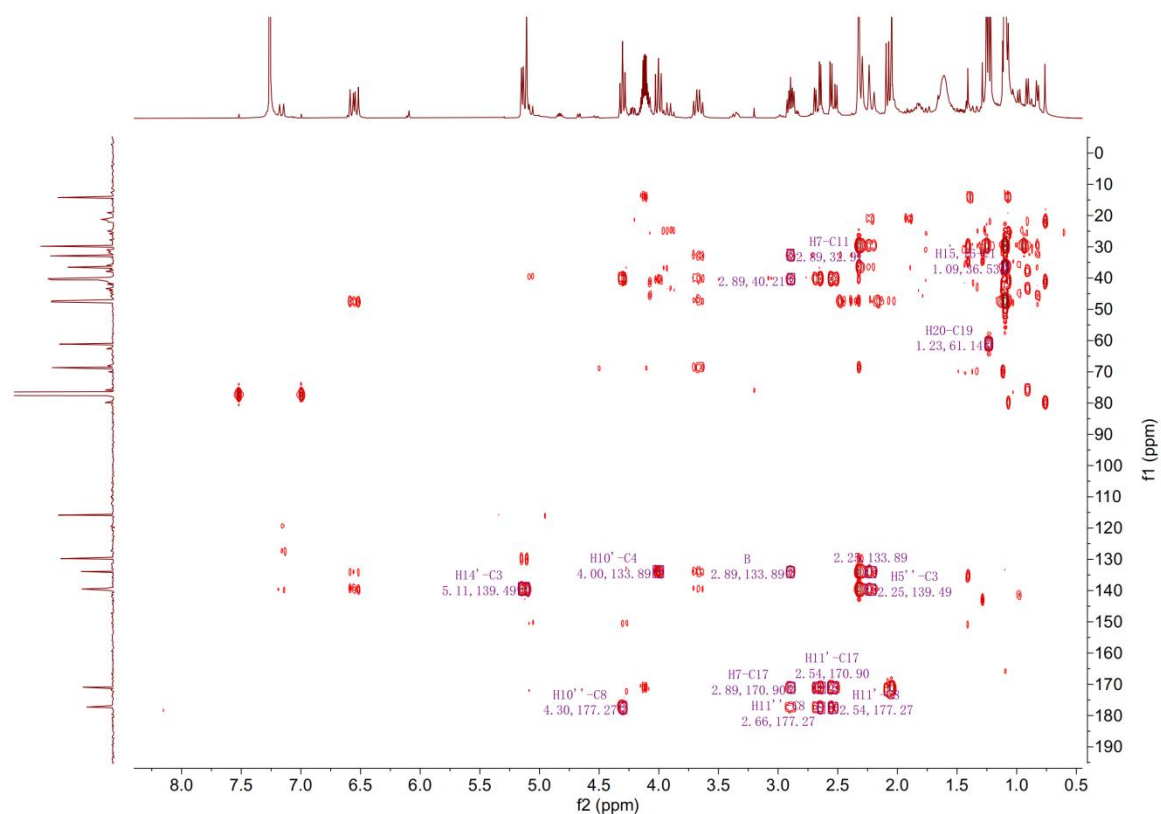

**Figure S22** HMBC spectrum (400 MHz) of compound **3** in Chloroform-d



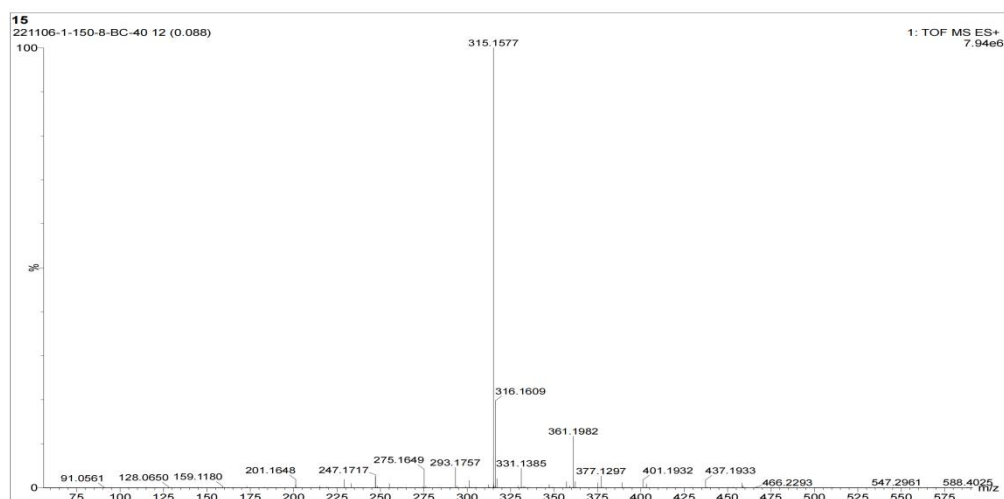

**Figure S25** HRESIMS spectrum of compound **3**

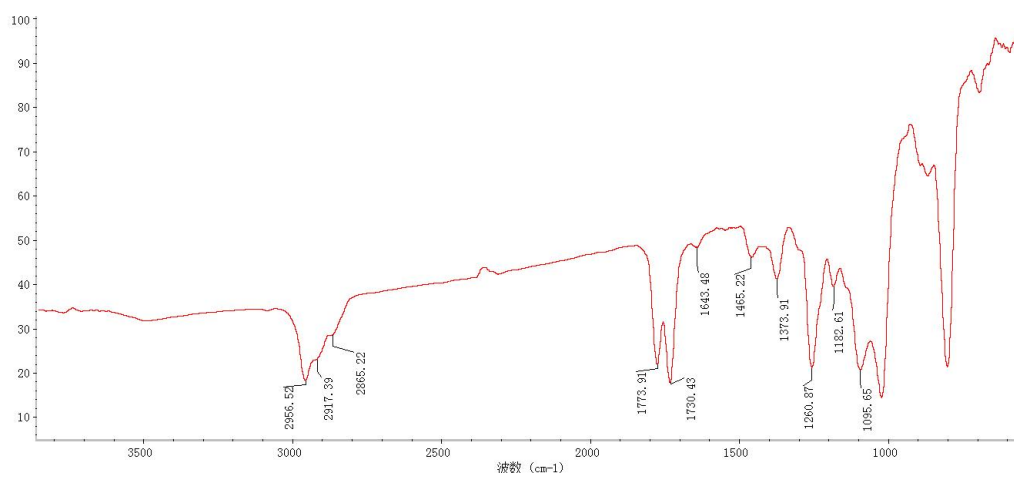

**Figure S26** IR spectrum of compound **3**

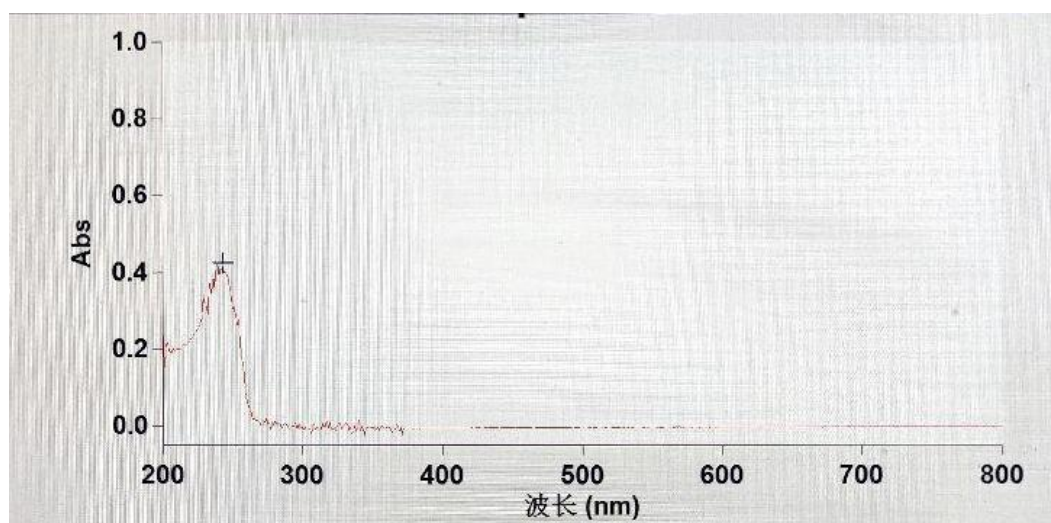

**Figure S27** UV spectrum of compound **3**

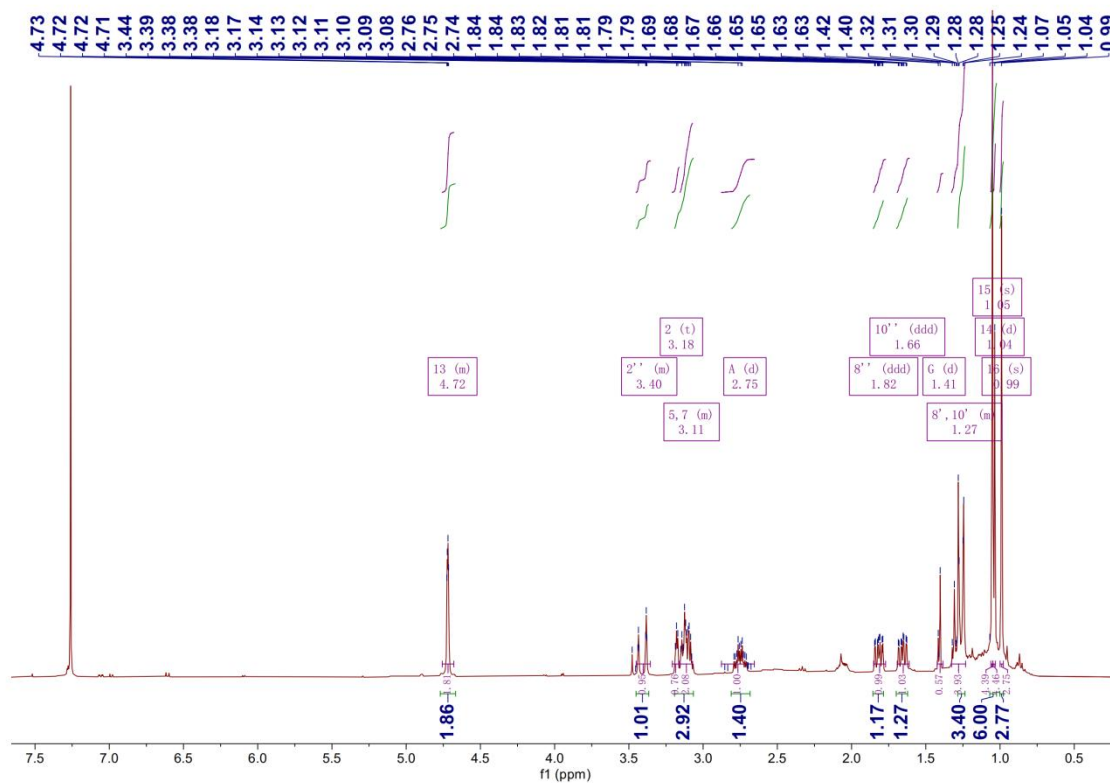

Figure S28 <sup>1</sup>H NMR spectrum (400 MHz) of compound 4 in Chloroform-d

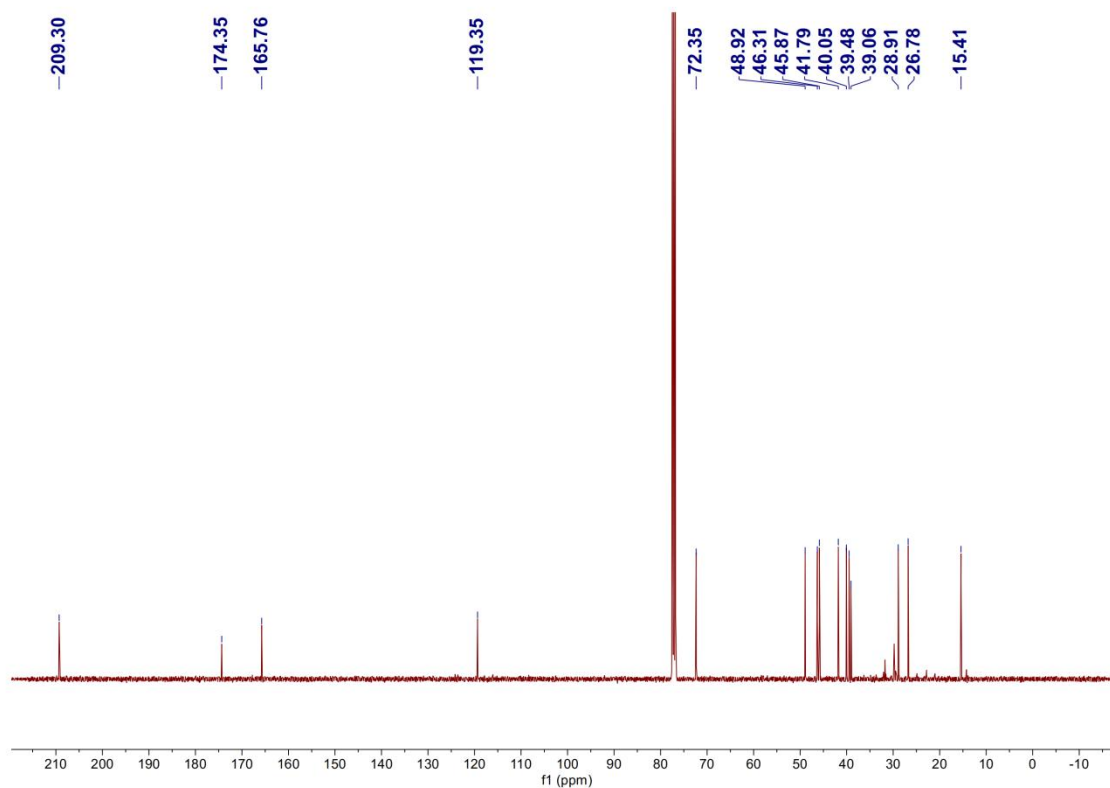

Figure S29 <sup>13</sup>C NMR spectrum (400 MHz) of compound 4 in Chloroform-d





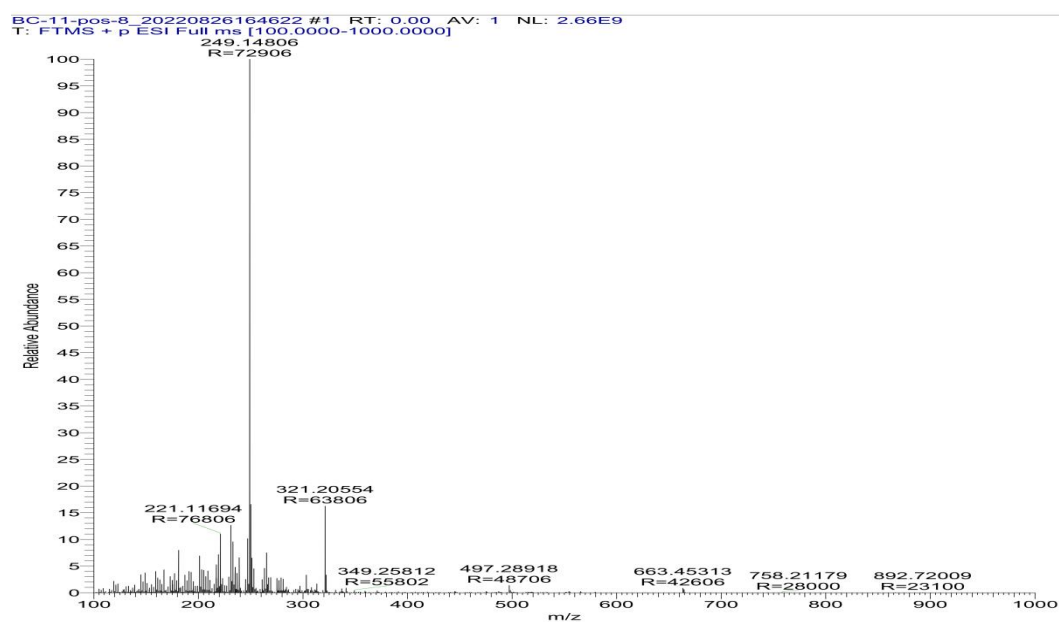

**Figure S34** HRESIMS spectrum of compound **4**

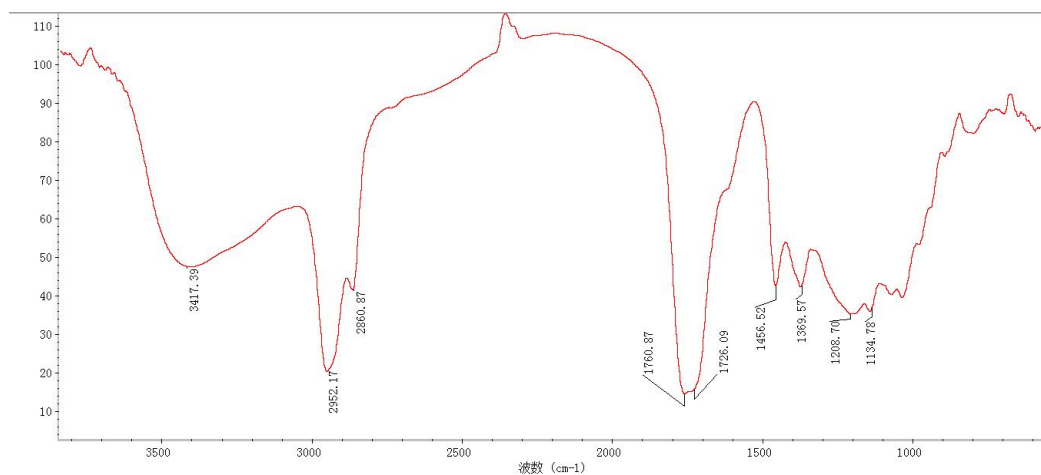

**Figure S35** IR spectrum of compound **4**

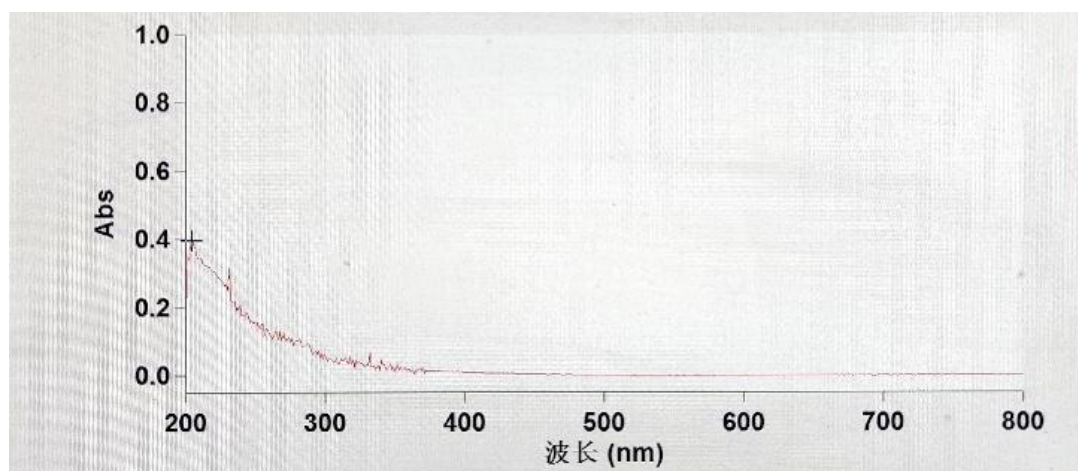

**Figure S36** UV spectrum of compound **4**

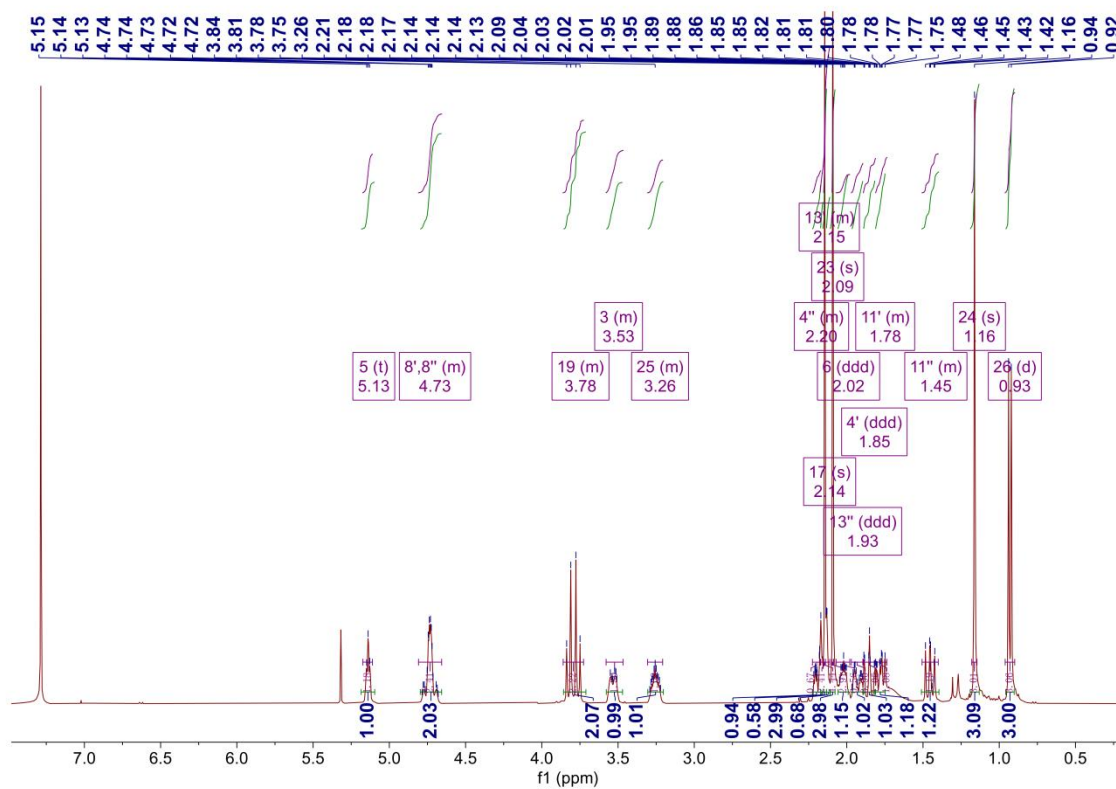

**Figure S37**  $^1\text{H}$  NMR spectrum (400 MHz) of compound **5** in Chloroform- $d$

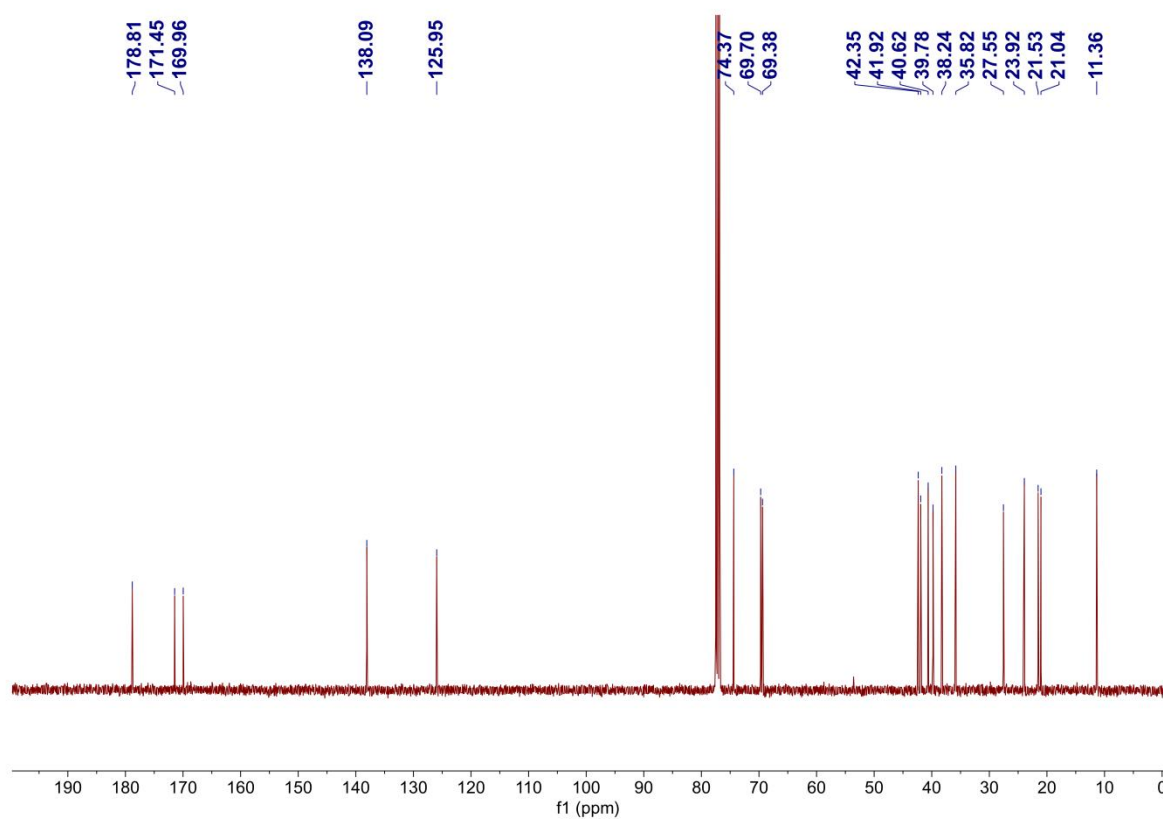

**Figure S38**  $^{13}\text{C}$  NMR spectrum (400 MHz) of compound **5** in Chloroform- $d$

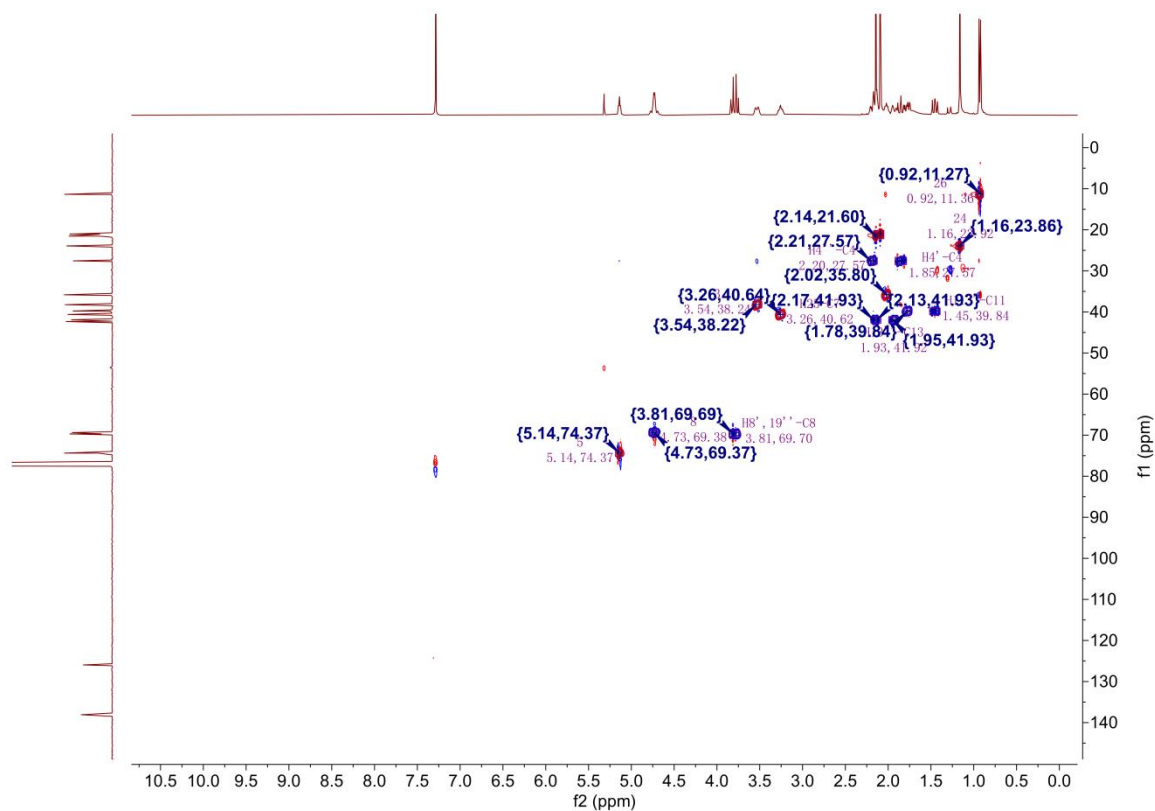

**Figure S39** HSQC spectrum (400 MHz) of compound **5** in Chloroform-d

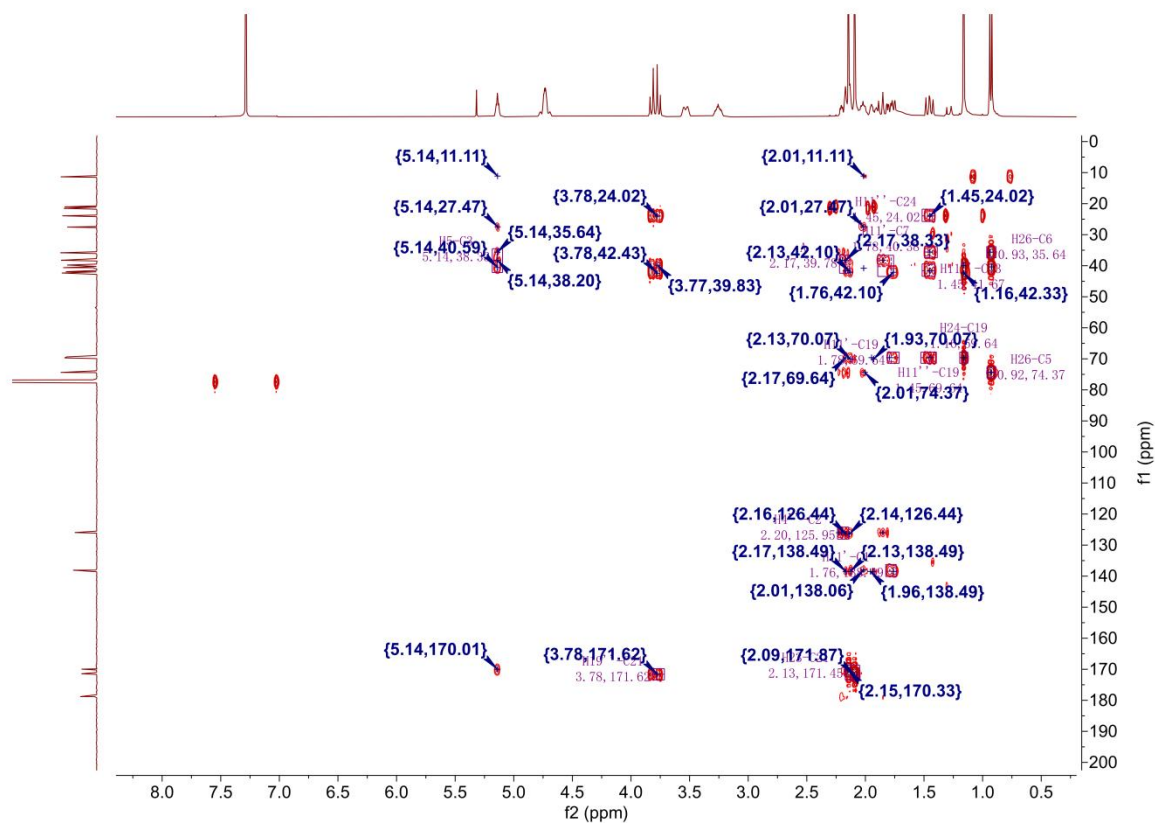

**Figure S40** HMBC spectrum (400 MHz) of compound **5** in Chloroform-d



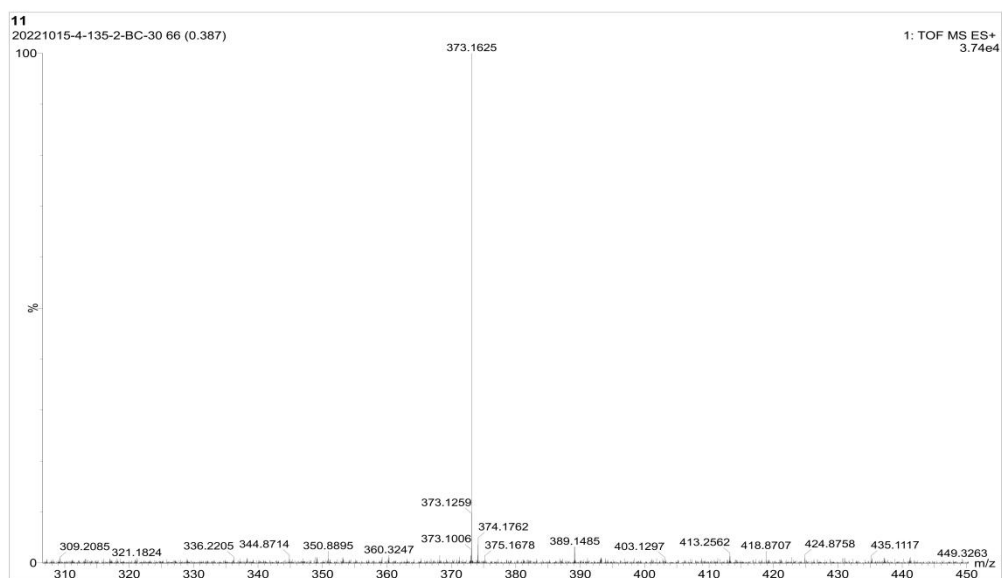

**Figure S43** HRESIMS spectrum of compound **5**

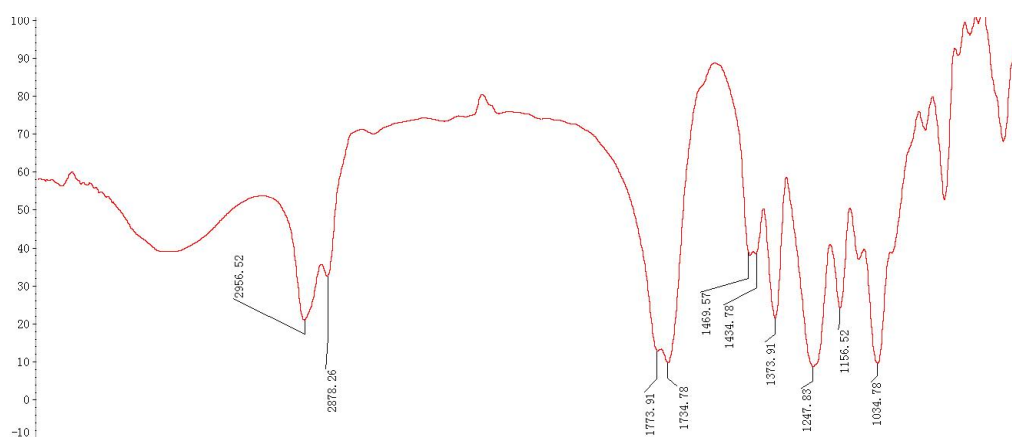

**Figure S44** IR spectrum of compound **5**

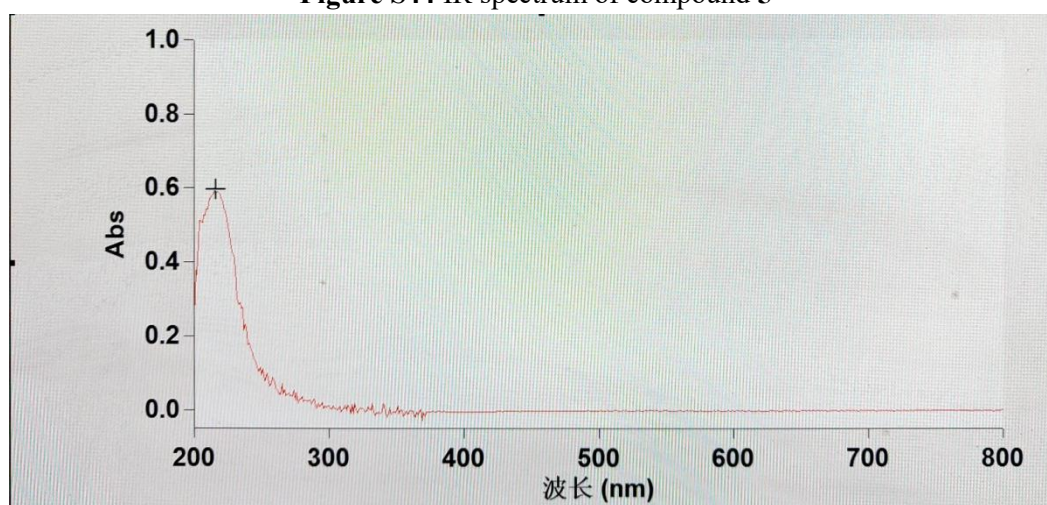

**Figure S45** UV spectrum of compound **5**

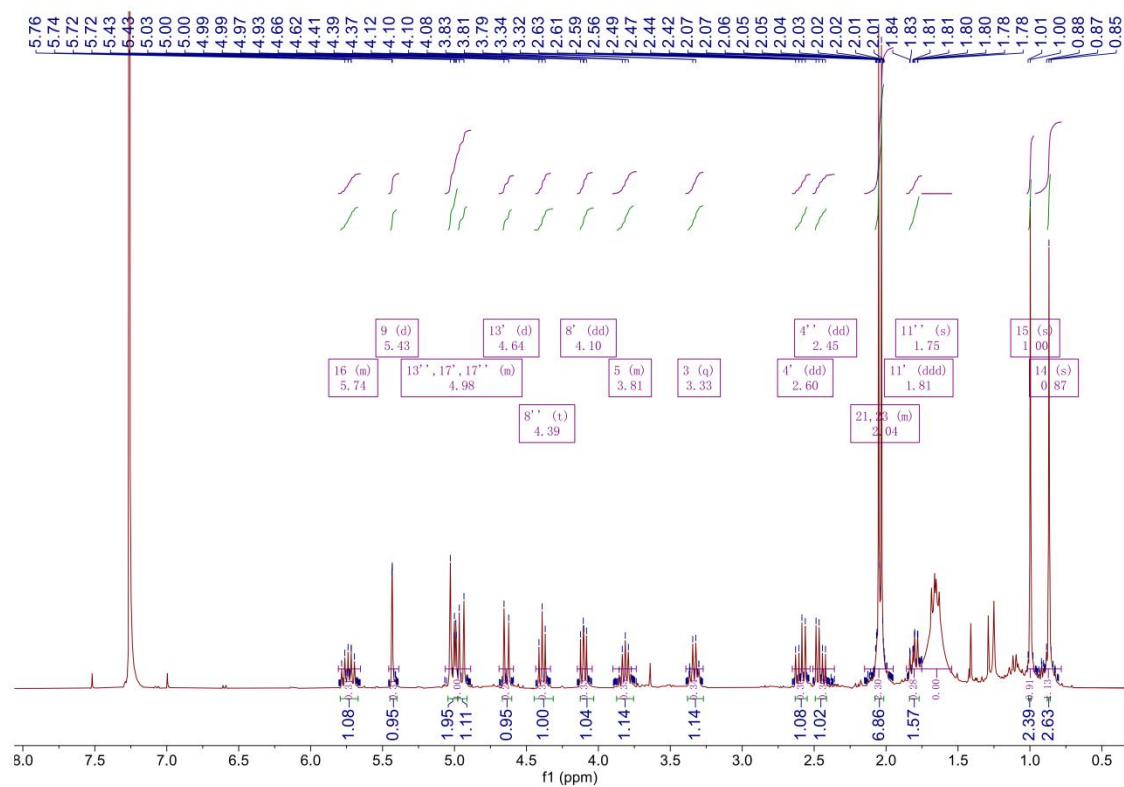

**Figure S46**  $^1\text{H}$  NMR spectrum (400 MHz) of compound **6** in Chloroform- $d$

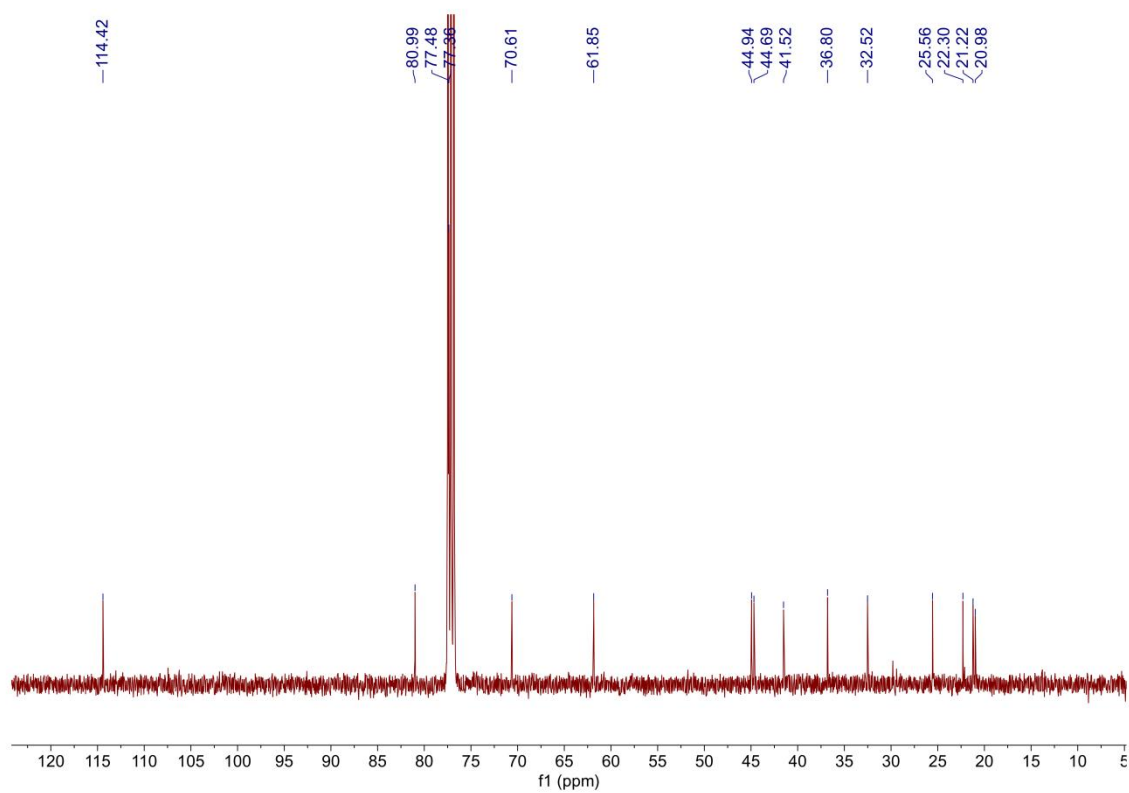

**Figure S47**  $^{13}\text{C}$  NMR spectrum (400 MHz) of compound **6** in Chloroform- $d$

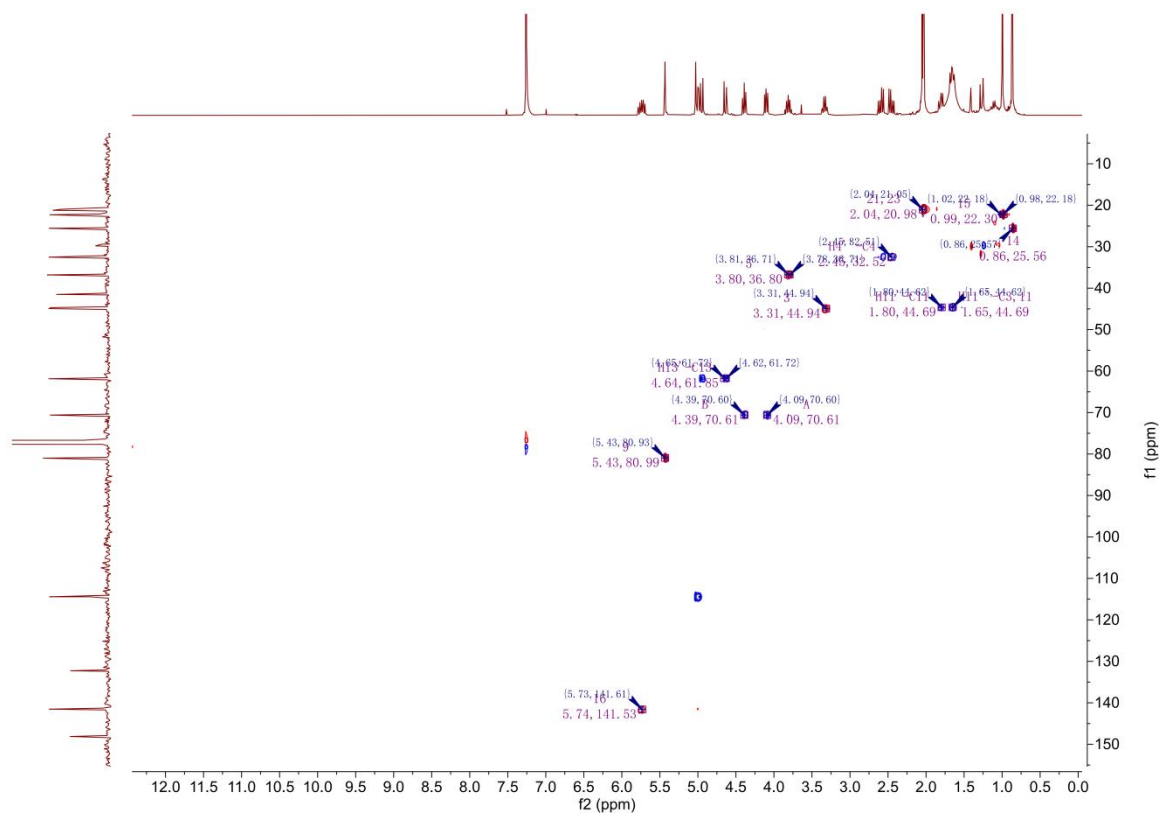

**Figure S48** HSQC spectrum (400 MHz) of compound **6** in Chloroform-d

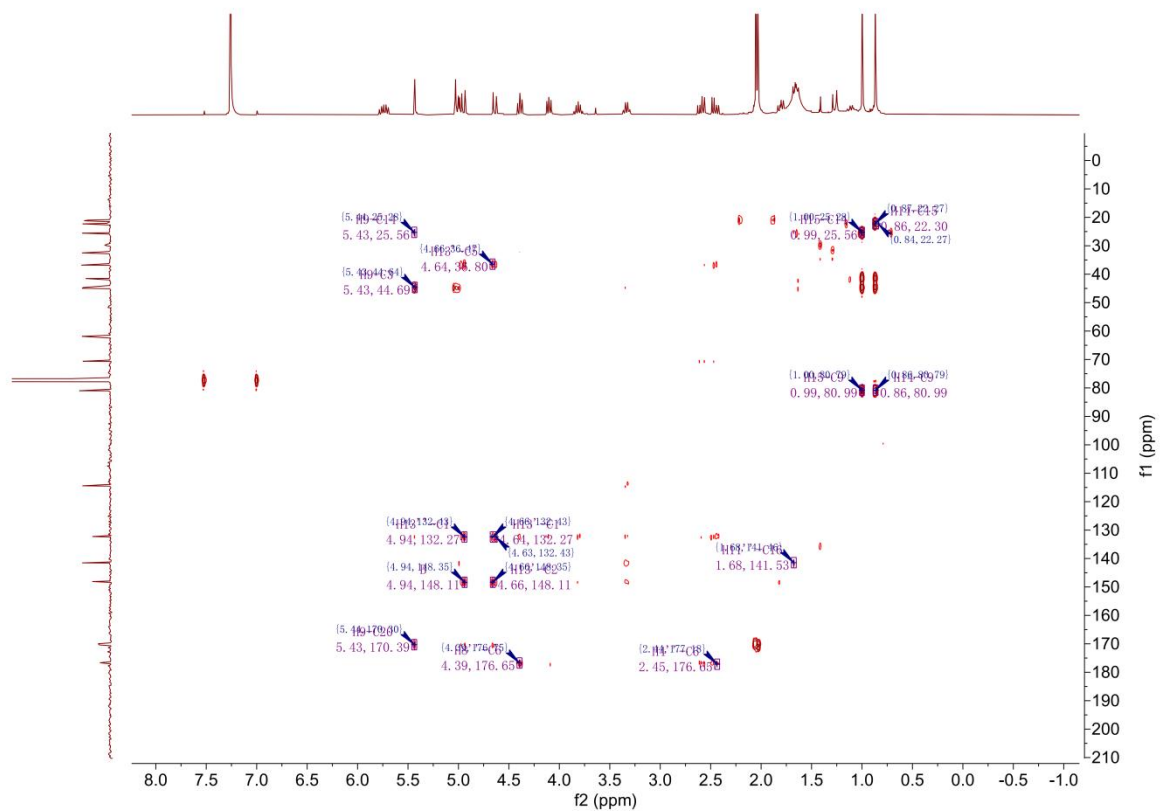

**Figure S49** HMBC spectrum (400 MHz) of compound **6** in Chloroform-d



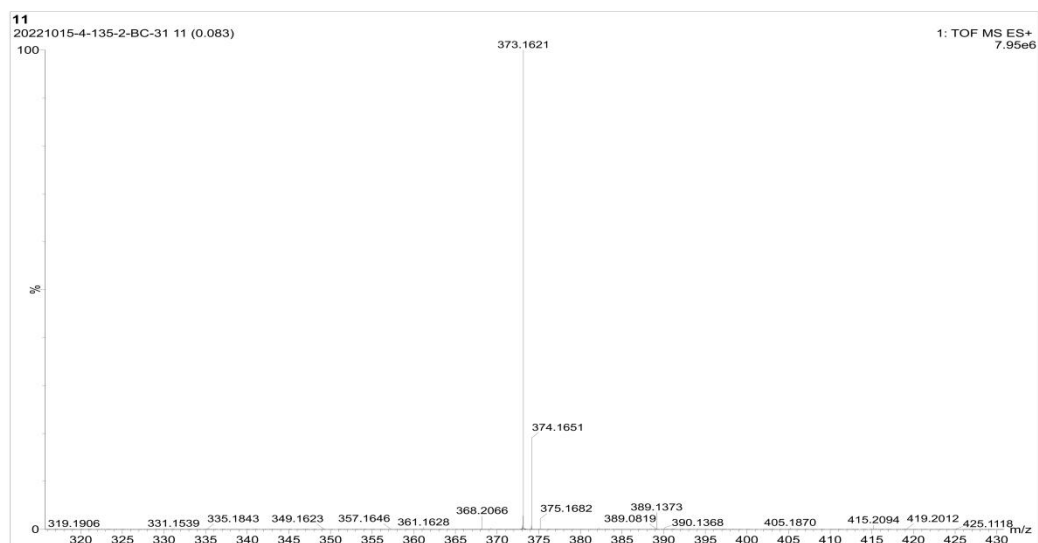

**Figure S52** HRESIMS spectrum of compound **6**

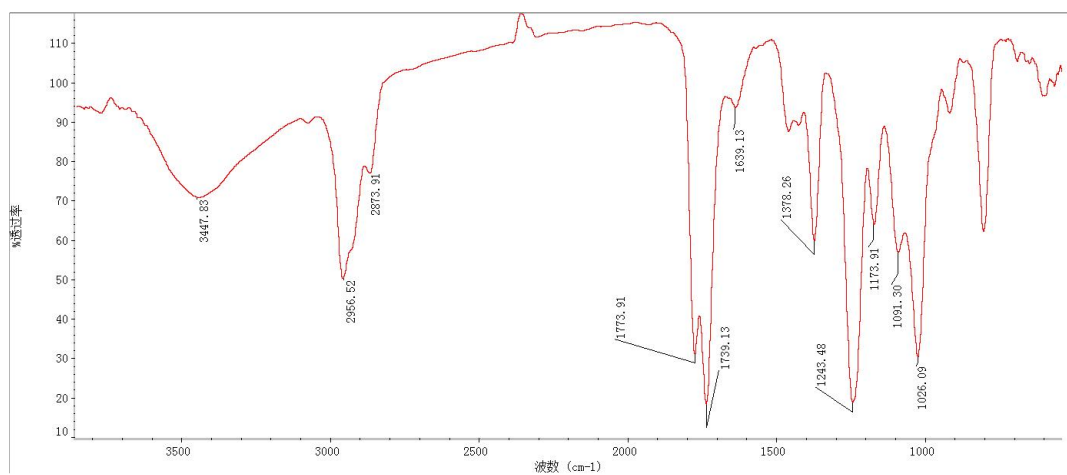

**Figure S53** IR spectrum of compound **6**

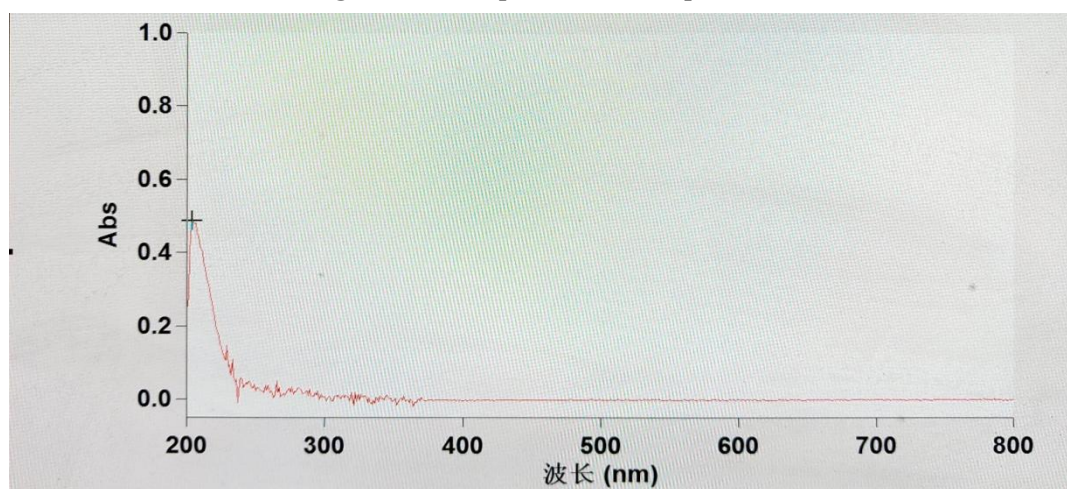

**Figure S54** UV spectrum of compound **6**

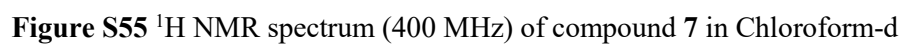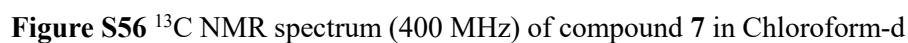

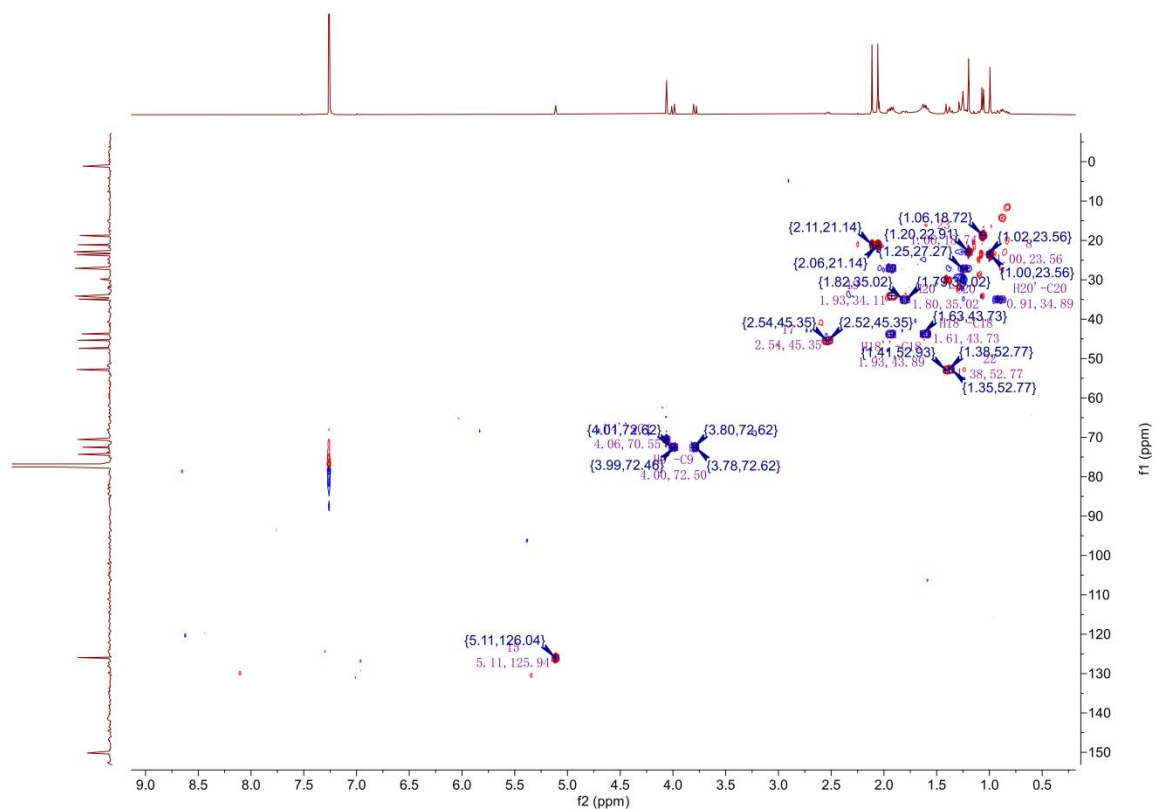

**Figure S57** HSQC spectrum (400 MHz) of compound 7 in Chloroform-d

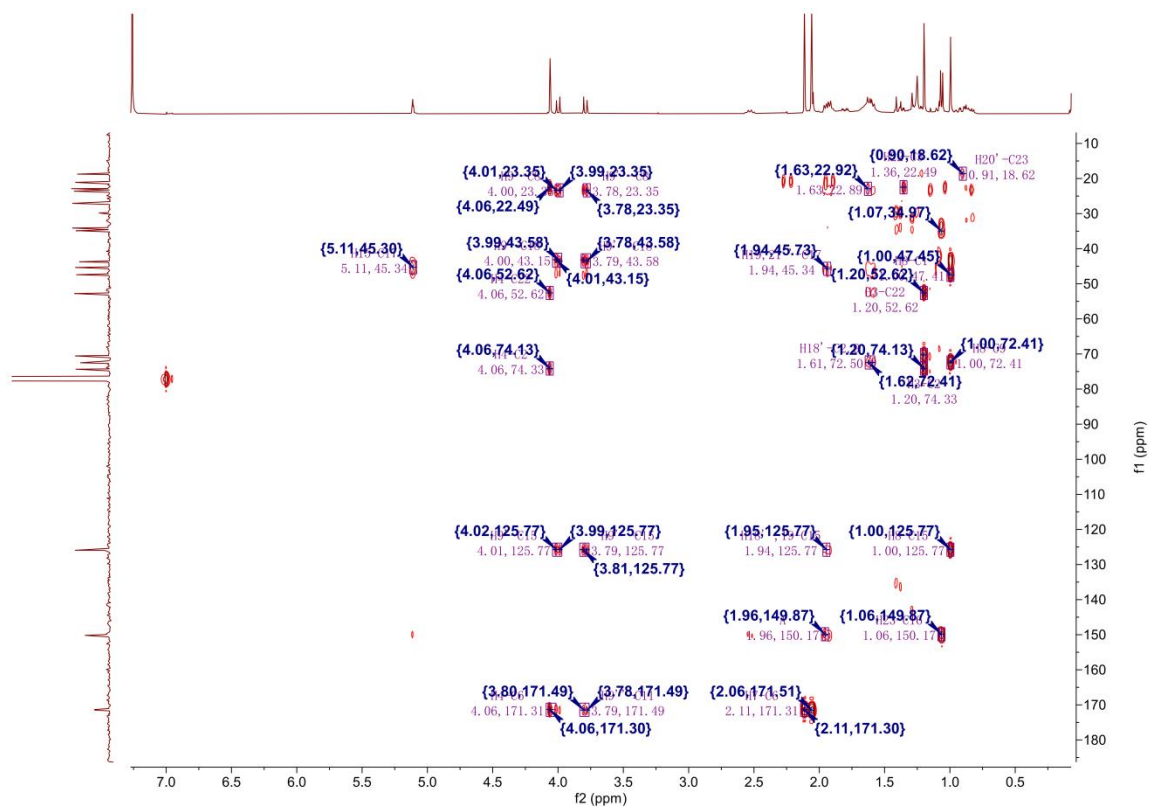

**Figure S58** HMBC spectrum (400 MHz) of compound 7 in Chloroform-d

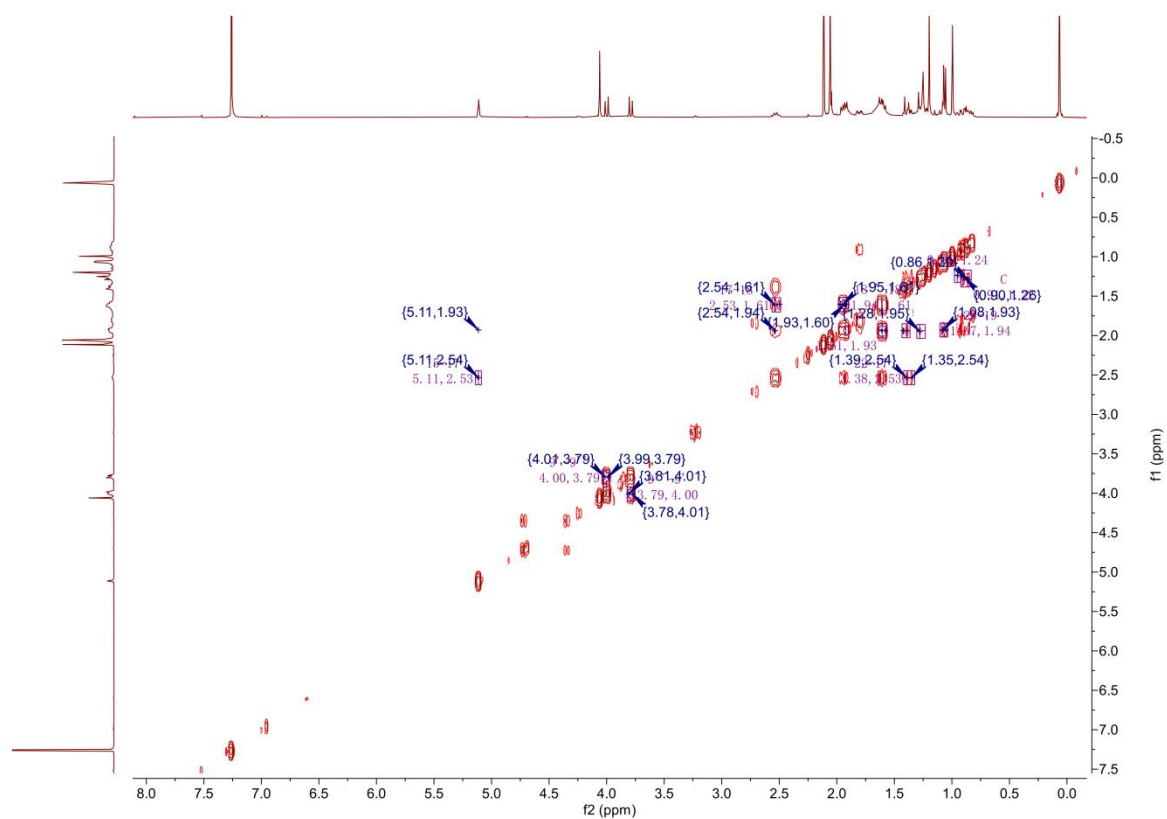

**Figure S59** COSY spectrum (400 MHz) of compound **7** in Chloroform-d

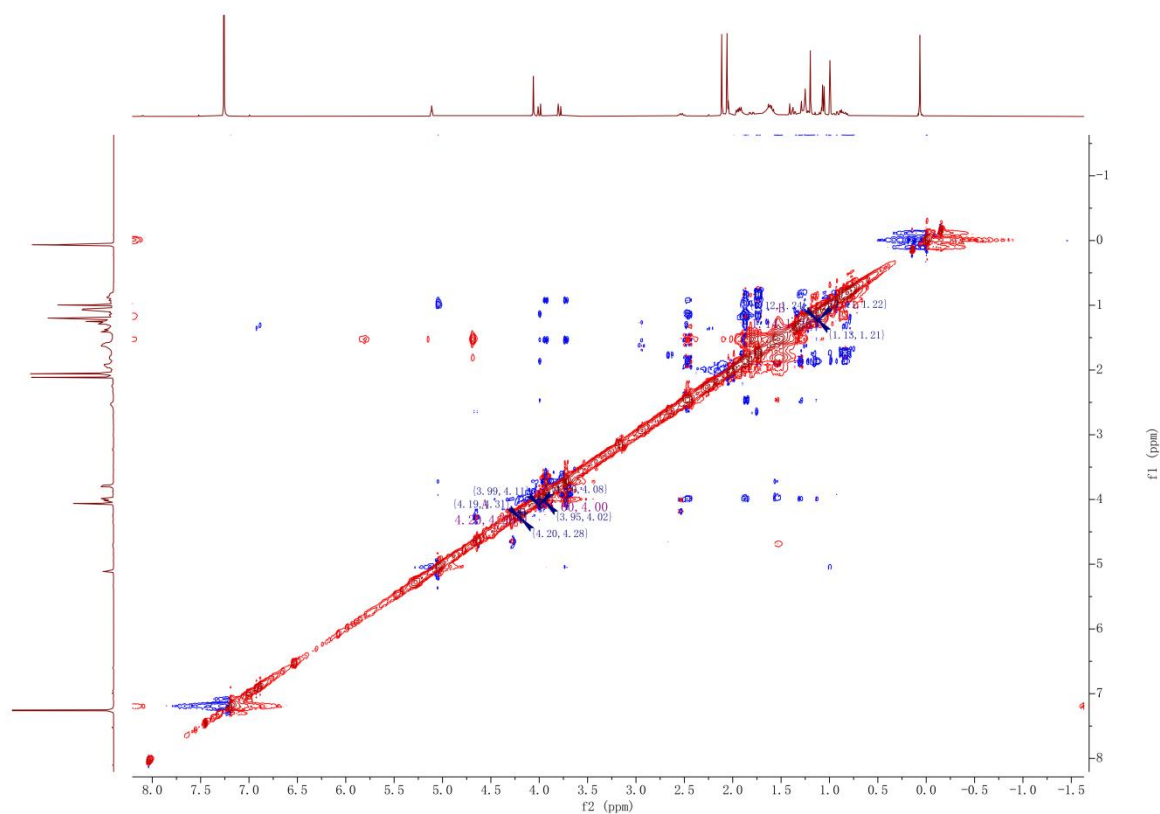

**Figure S60** NOESY spectrum (400 MHz) of compound **7** in Chloroform-d

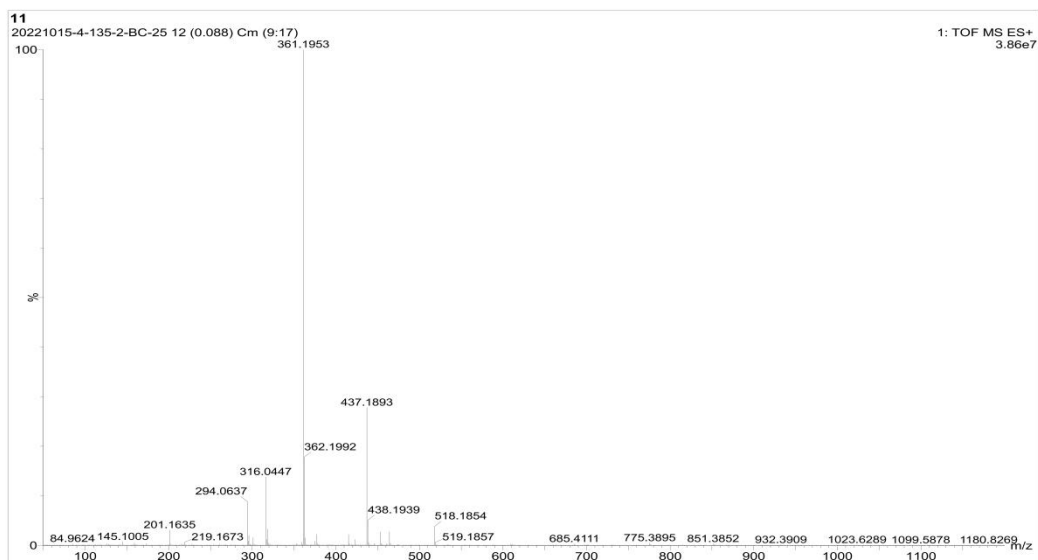

Figure S61 HRESIMS spectrum of compound 7

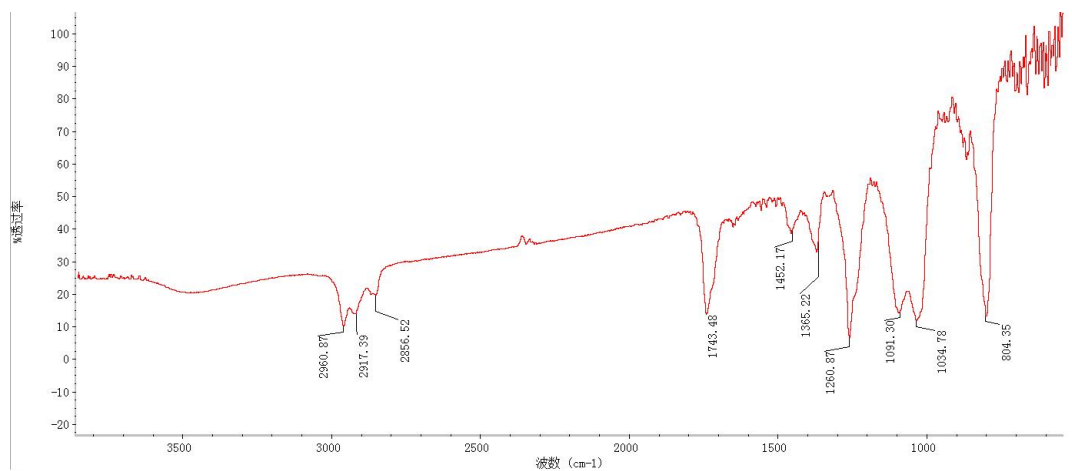

Figure S62 IR spectrum of compound 7

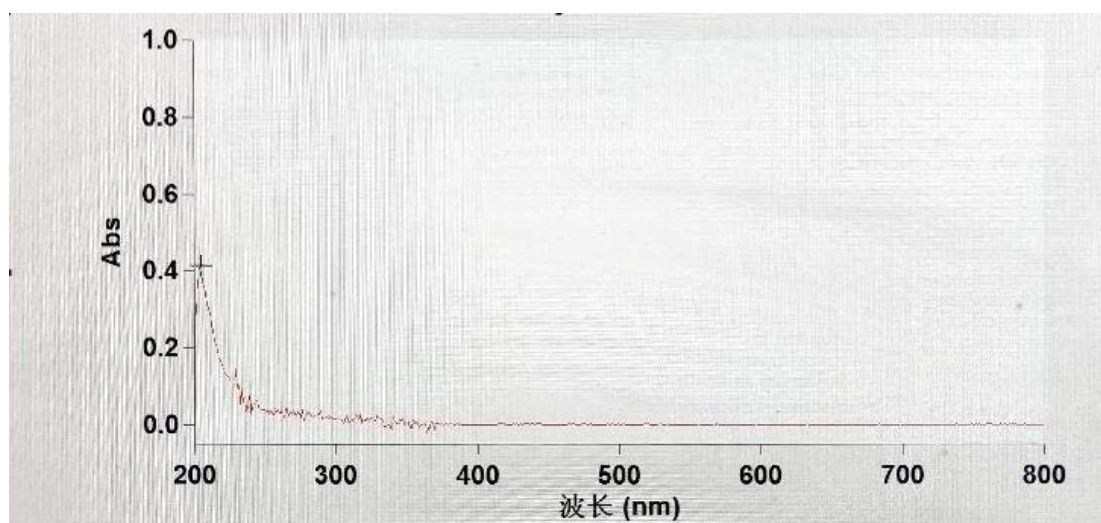

Figure S63 UV spectrum of compound 7

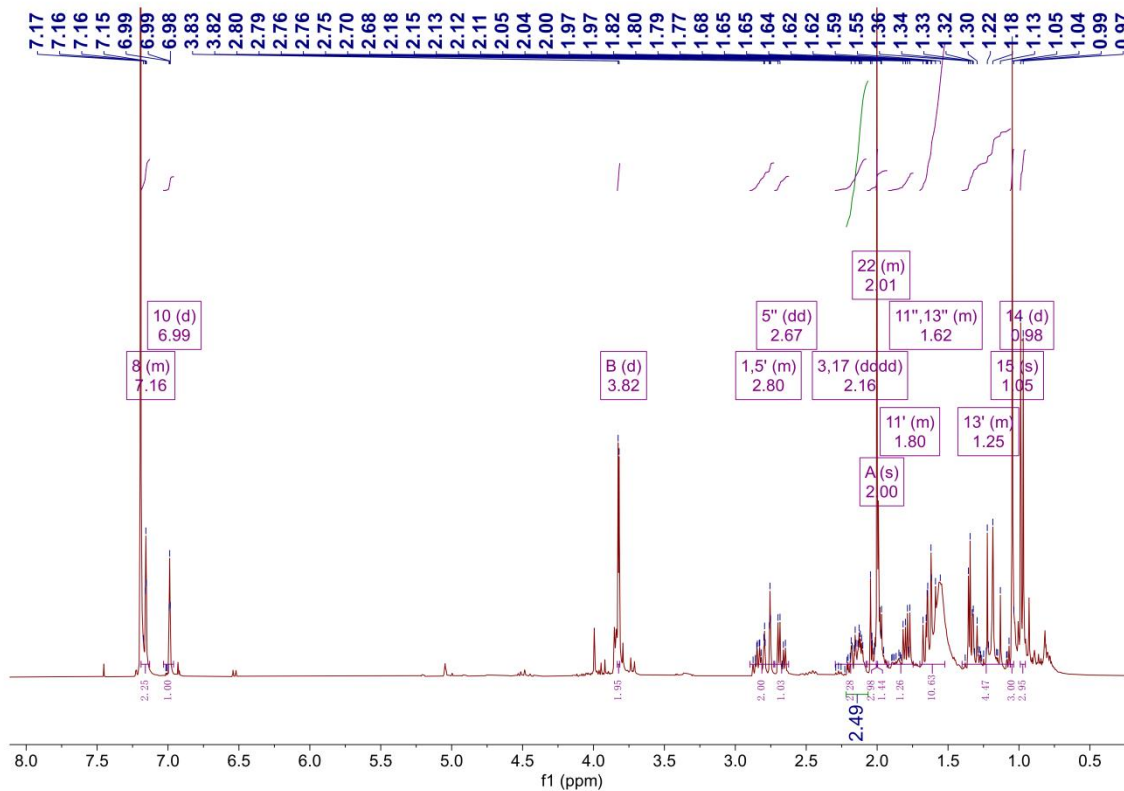

**Figure S64**  $^1\text{H}$  NMR spectrum (400 MHz) of compound **8** in Chloroform- $d$

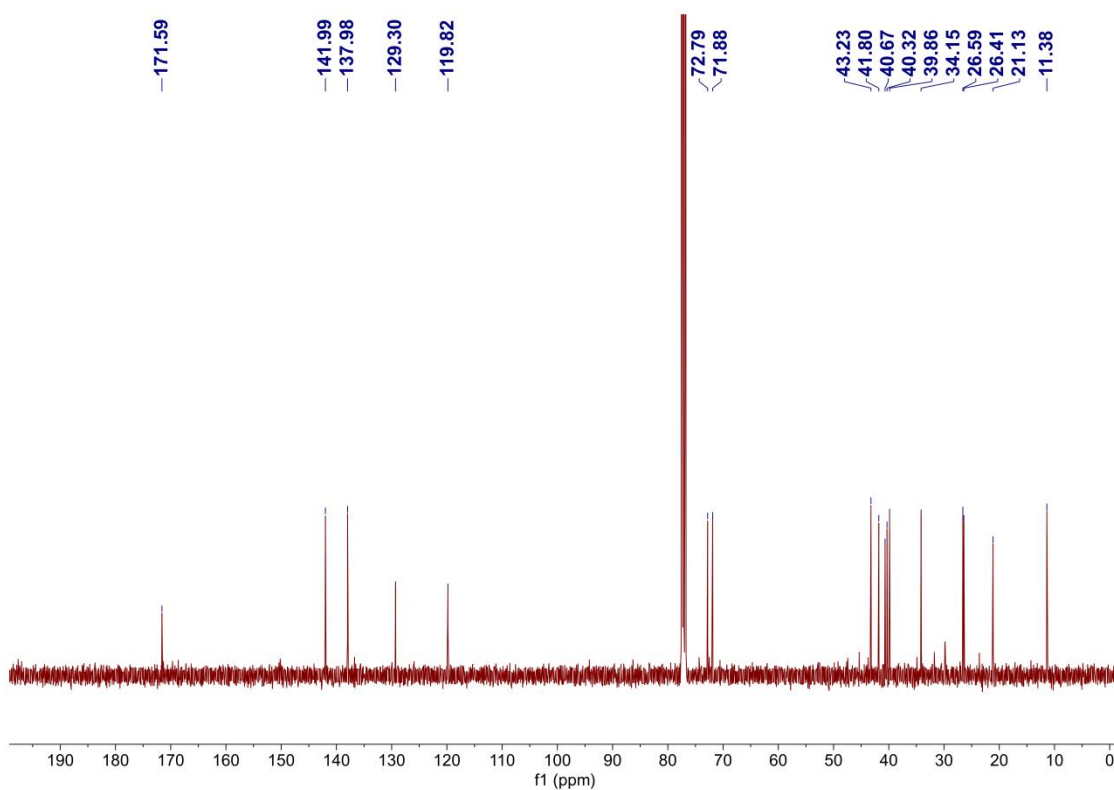

**Figure S65**  $^{13}\text{C}$  NMR spectrum (400 MHz) of compound **8** in Chloroform- $d$

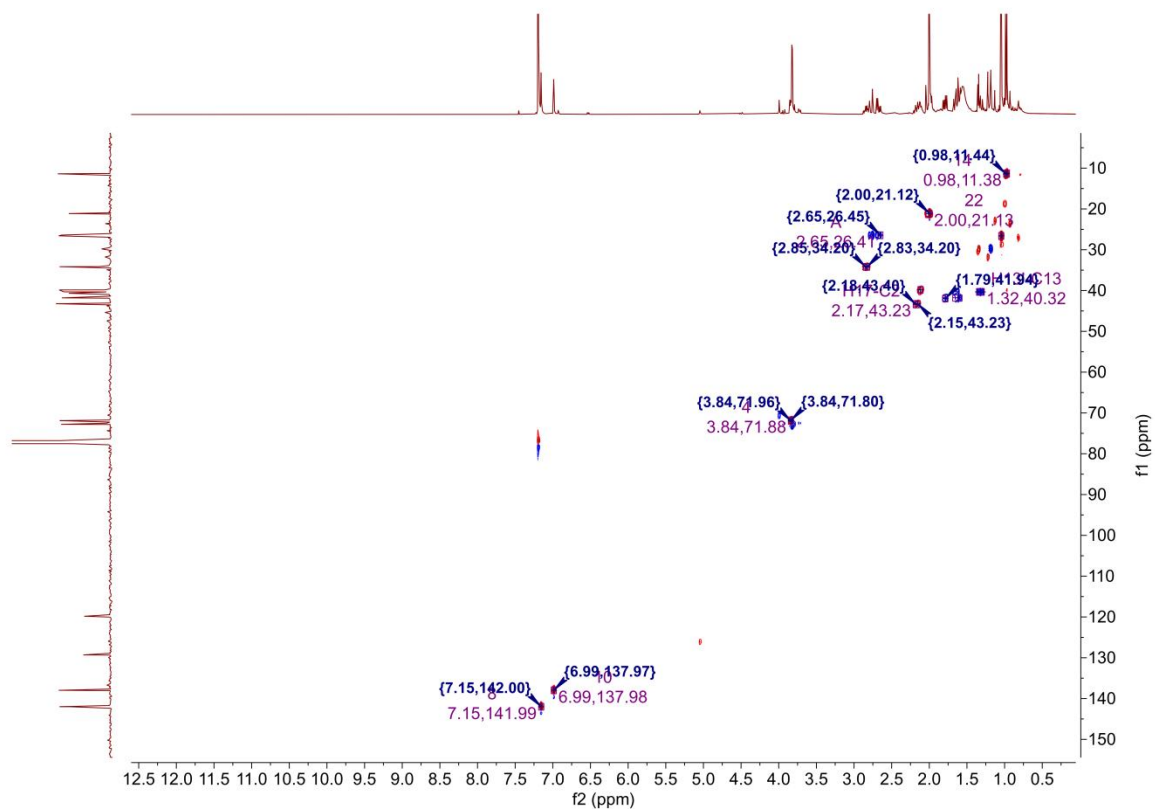

**Figure S66** HSQC spectrum (400 MHz) of compound **8** in Chloroform-d

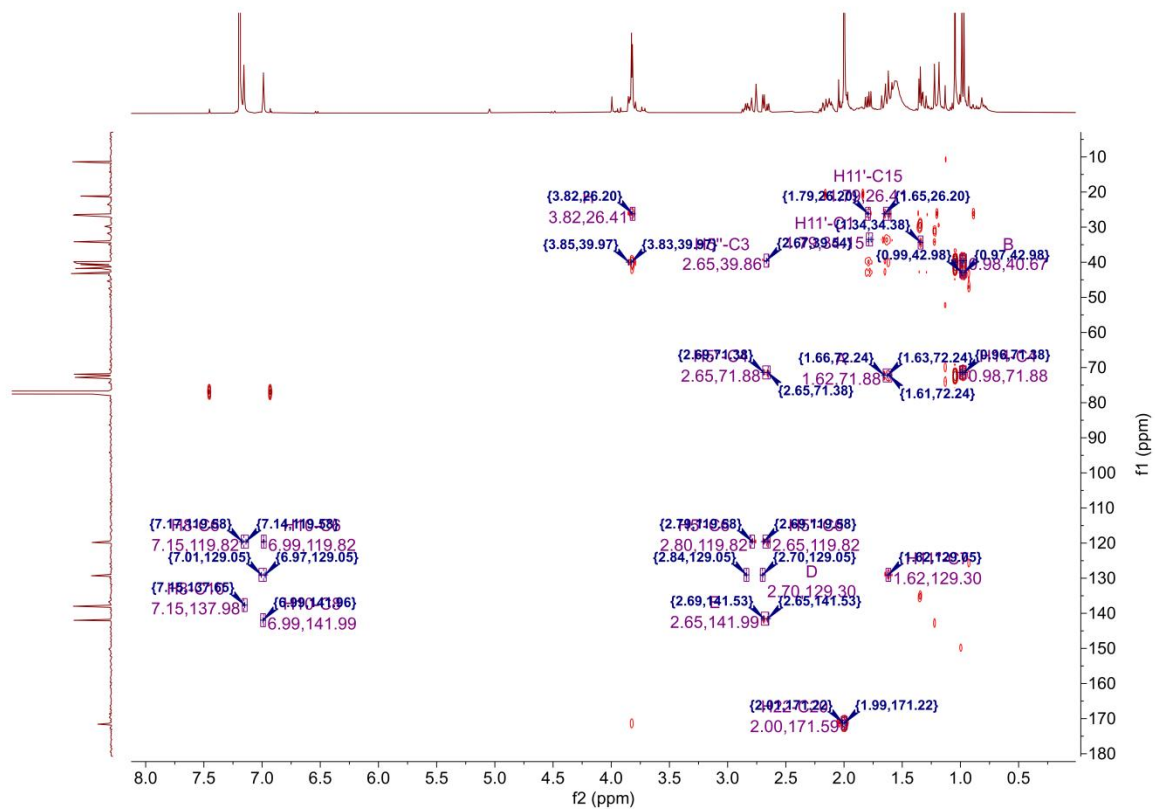

**Figure S67** HMBC spectrum (400 MHz) of compound **8** in Chloroform-d

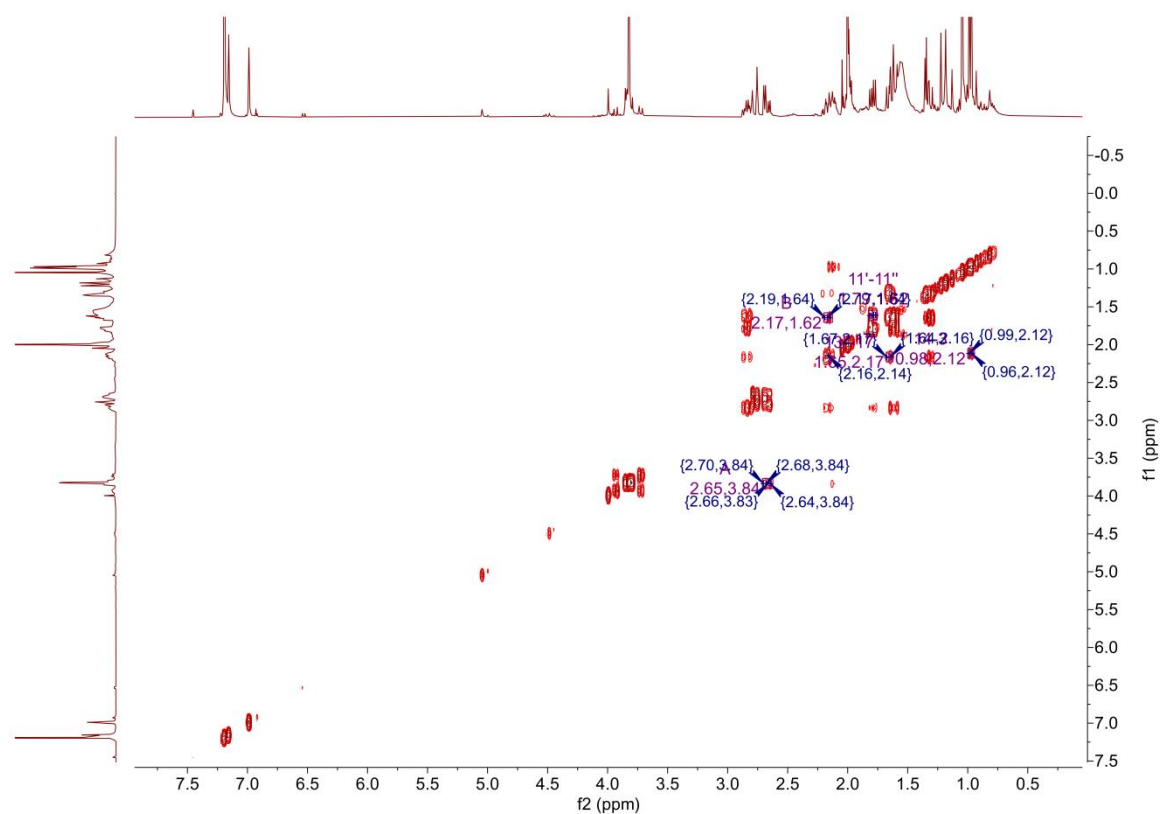

**Figure S68** COSY spectrum (400 MHz) of compound **8** in Chloroform-d

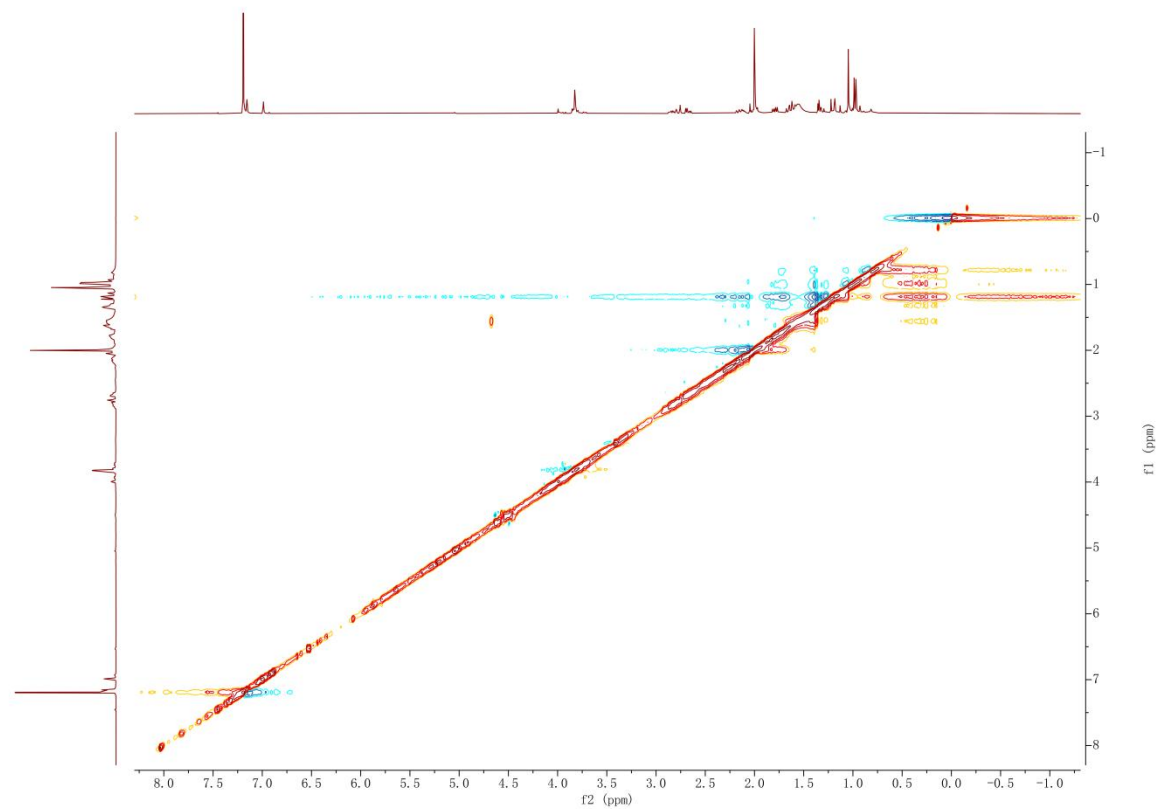

**Figure S69** NOESY spectrum (400 MHz) of compound **8** in Chloroform-d

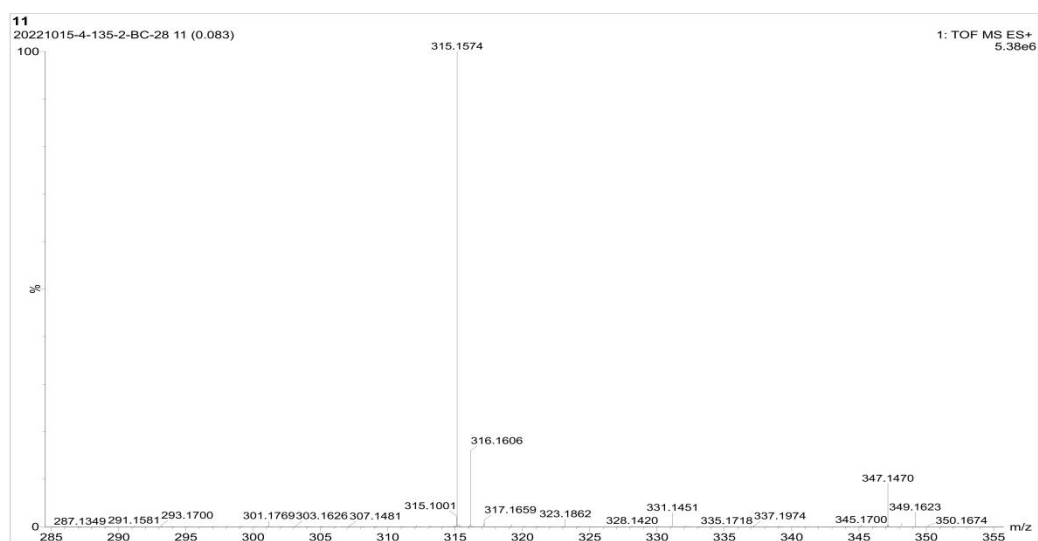

**Figure S70** HRESIMS spectrum of compound **8**

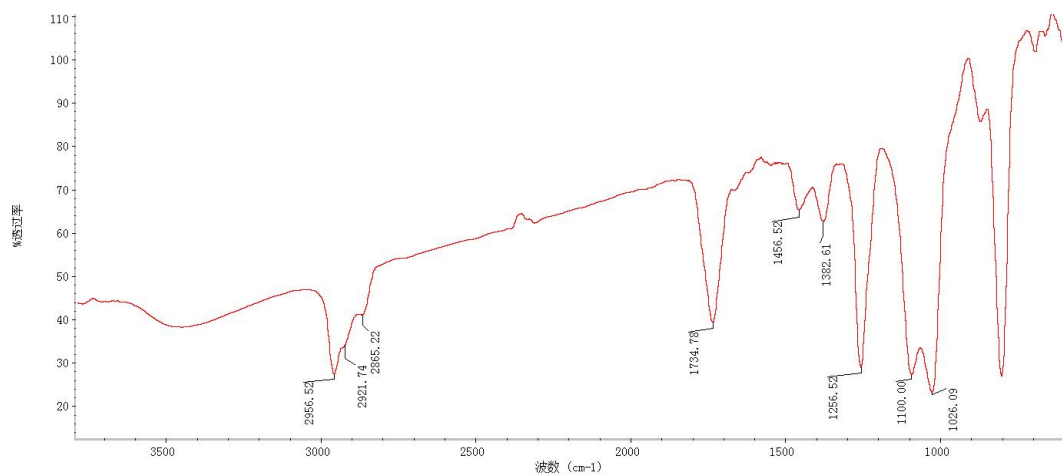

**Figure S71** IR spectrum of compound **8**

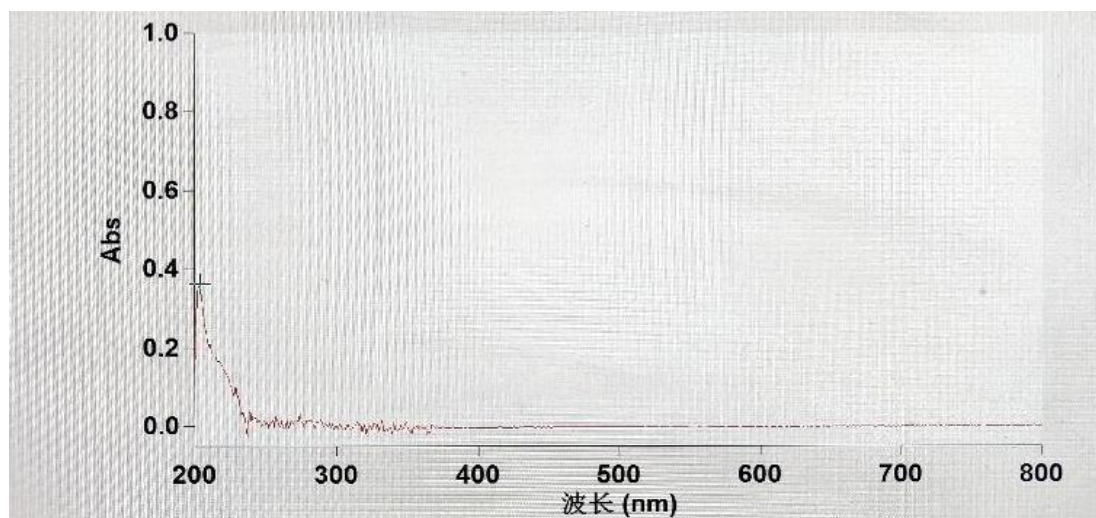

**Figure S72** UV spectrum of compound **8**

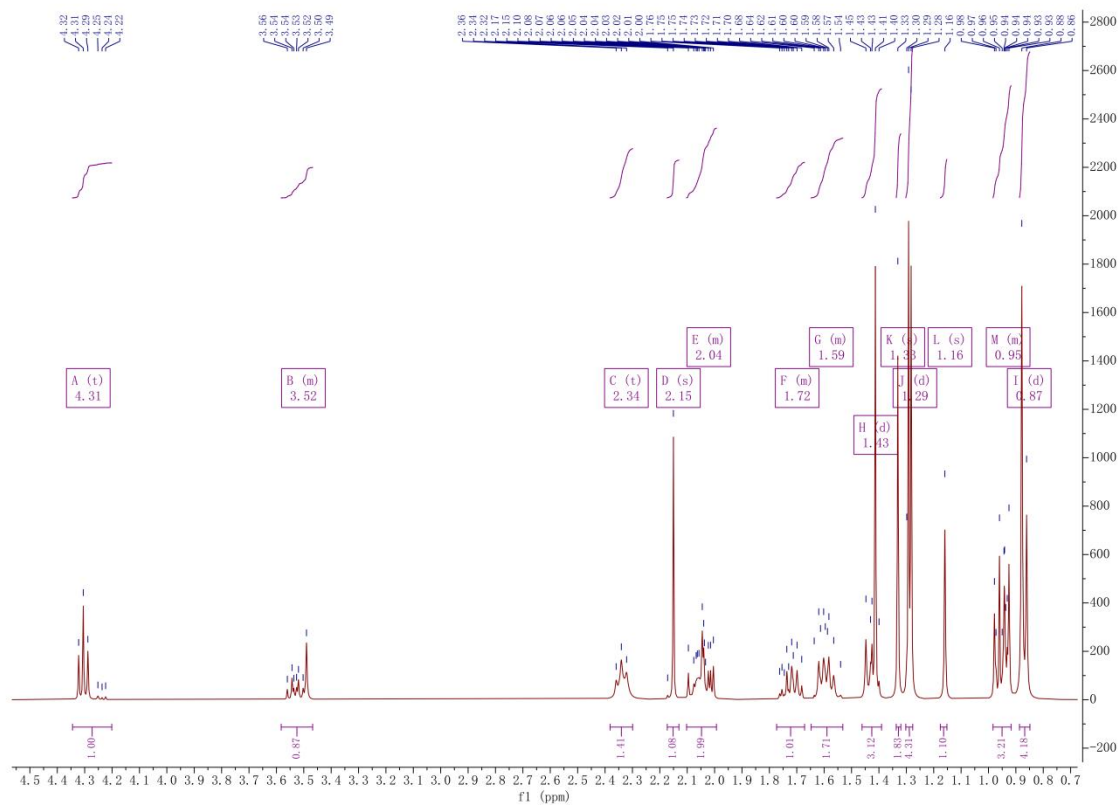

**Figure S73**  $^1\text{H}$  NMR spectrum (400 MHz) of compound **9** in Chloroform- $d$

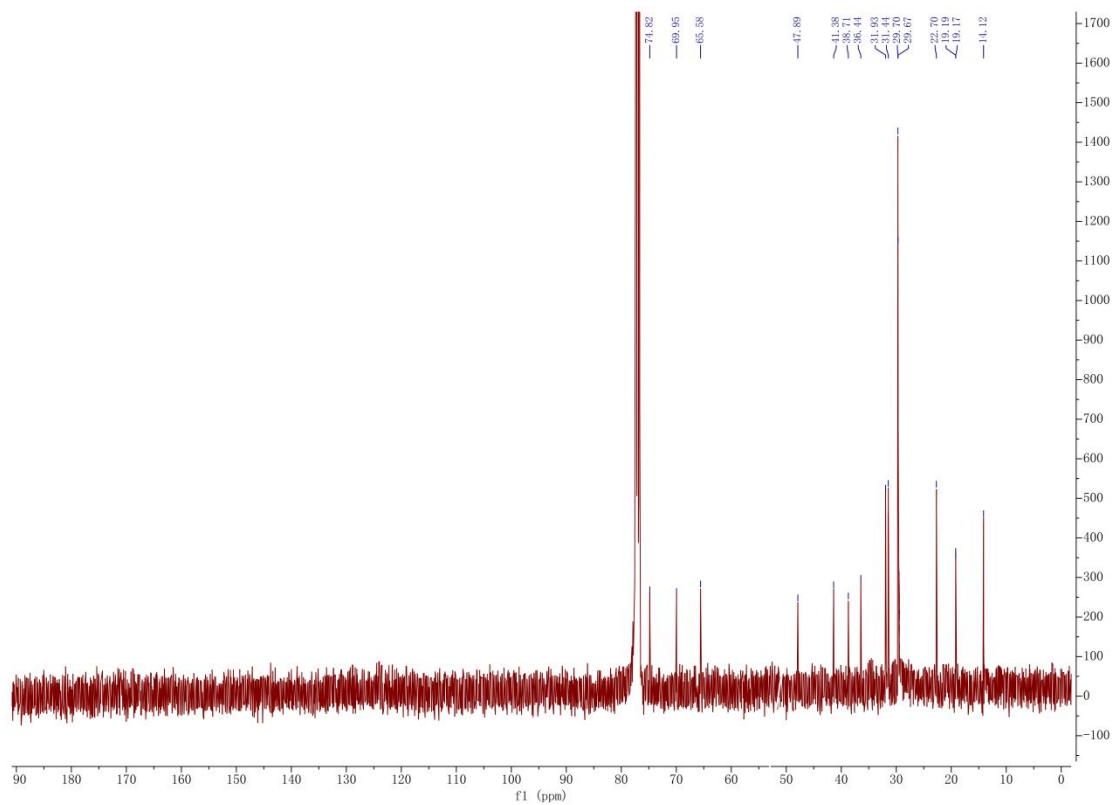

**Figure S74**  $^{13}\text{C}$  NMR spectrum (400 MHz) of compound **9** in Chloroform- $d$

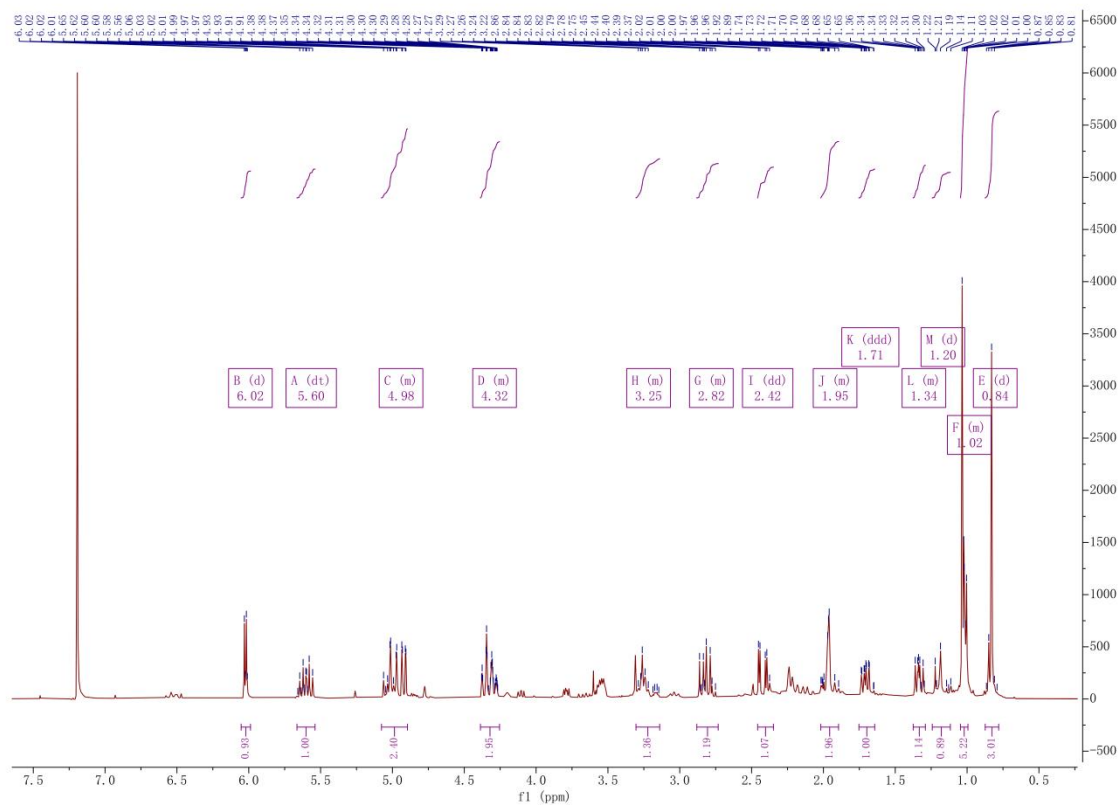

**Figure S75**  $^1\text{H}$  NMR spectrum (400 MHz) of compound **10** in Chloroform-d

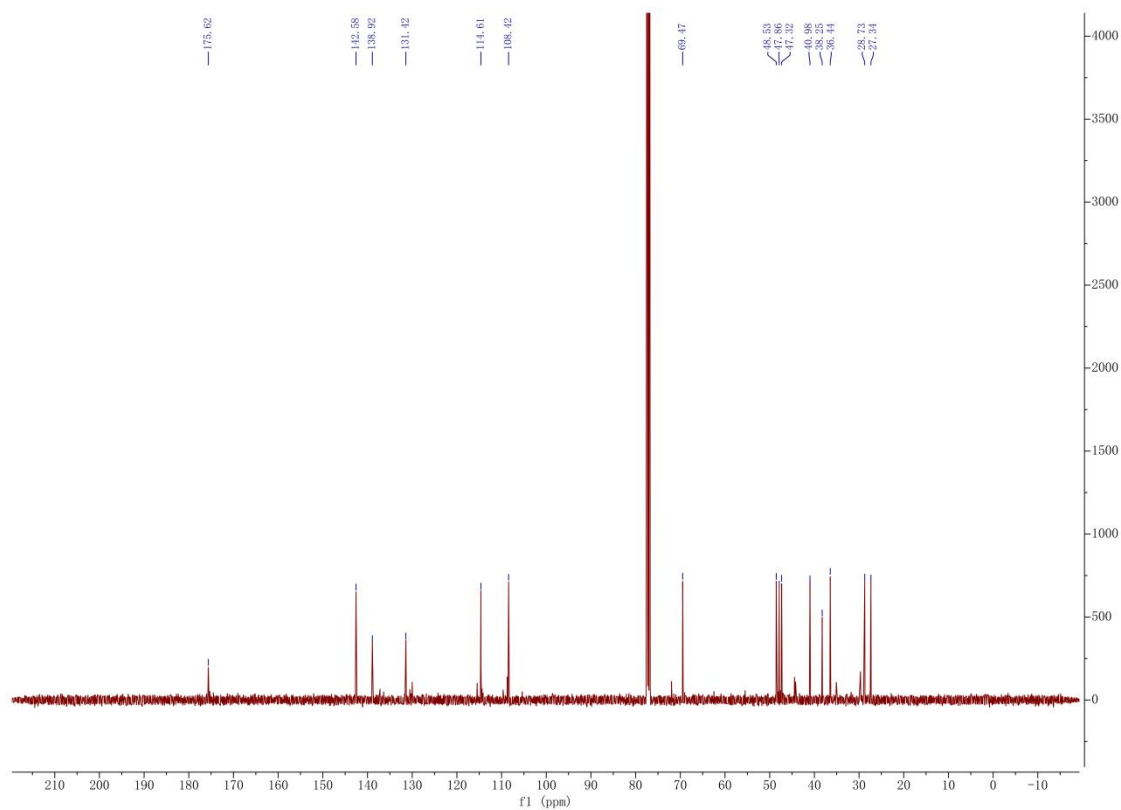

**Figure S76**  $^{13}\text{C}$  NMR spectrum (400 MHz) of compound **10** in Chloroform-d

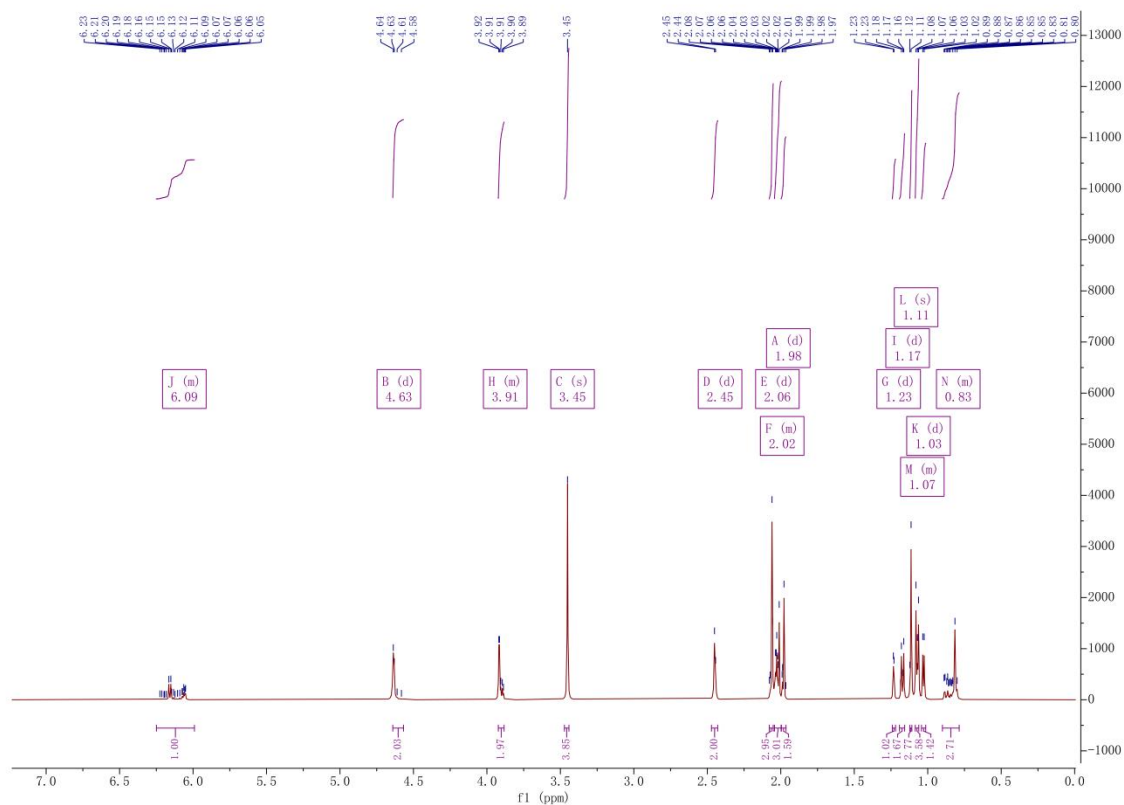

**Figure S77**  $^1\text{H}$  NMR spectrum (400 MHz) of compound **11** in Chloroform-d

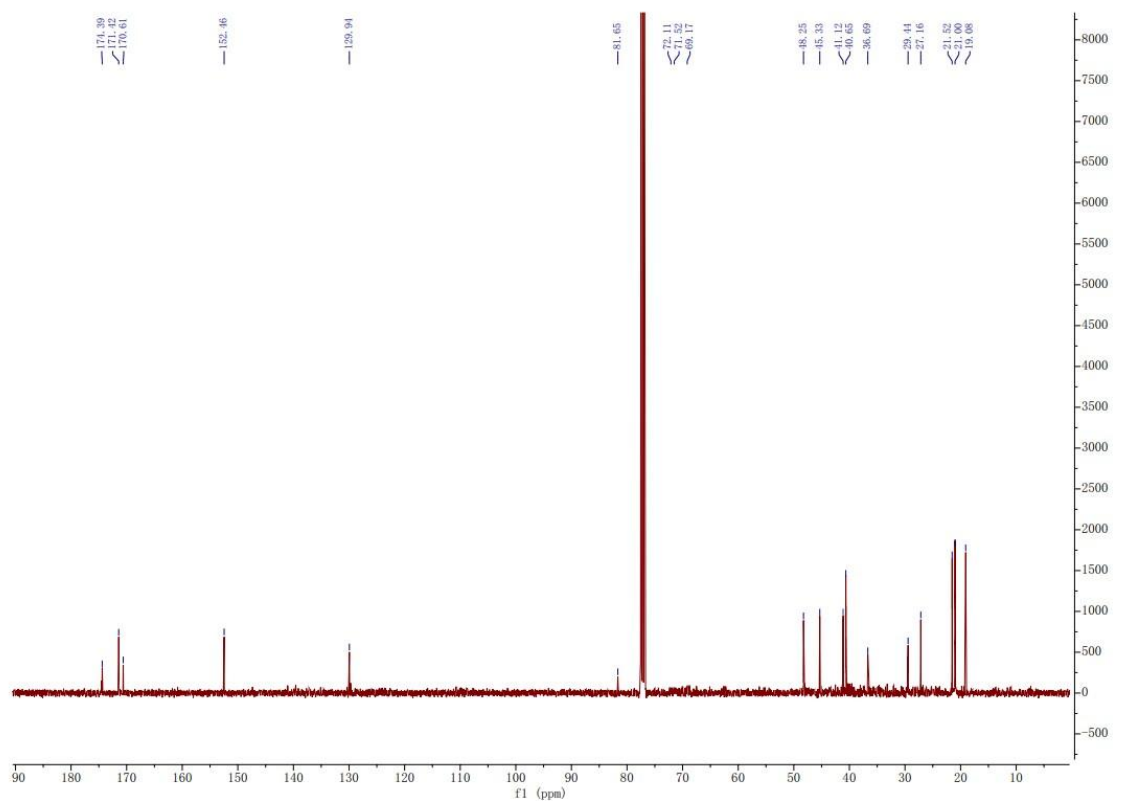

**Figure S78**  $^{13}\text{C}$  NMR spectrum (400 MHz) of compound **11** in Chloroform-d

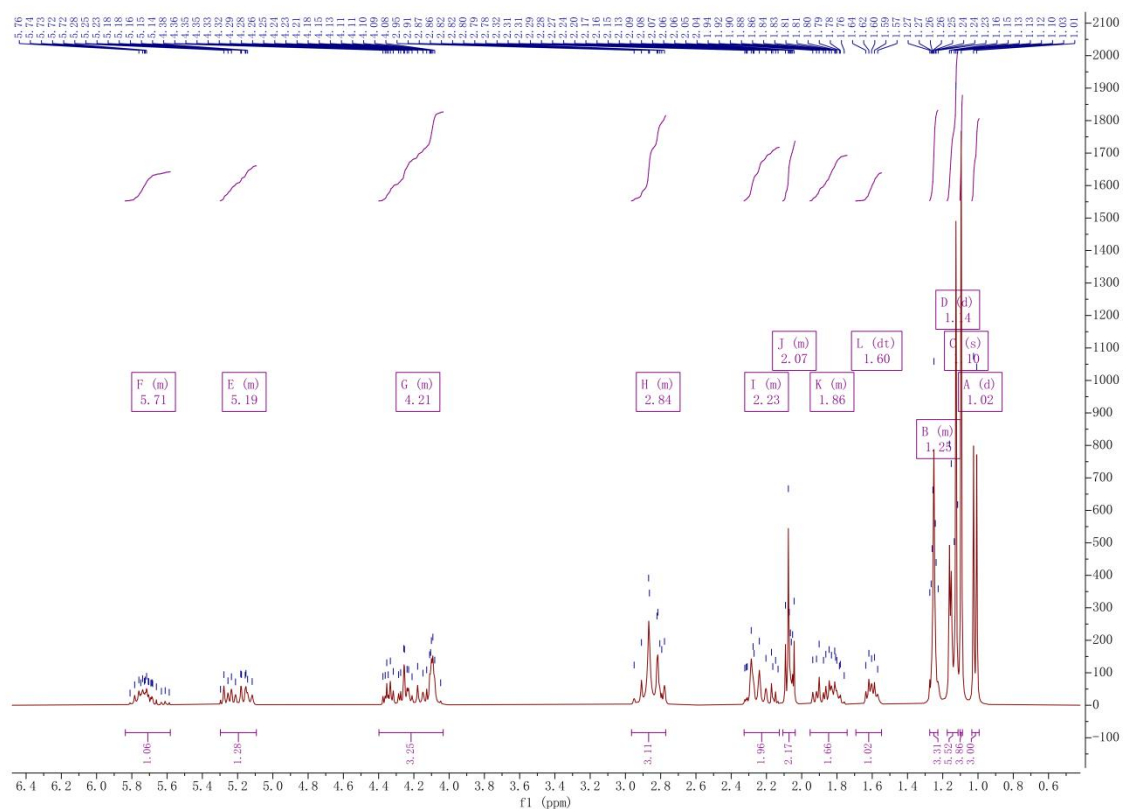

**Figure S79**  $^1\text{H}$  NMR spectrum (400 MHz) of compound **12** in Chloroform- $d$

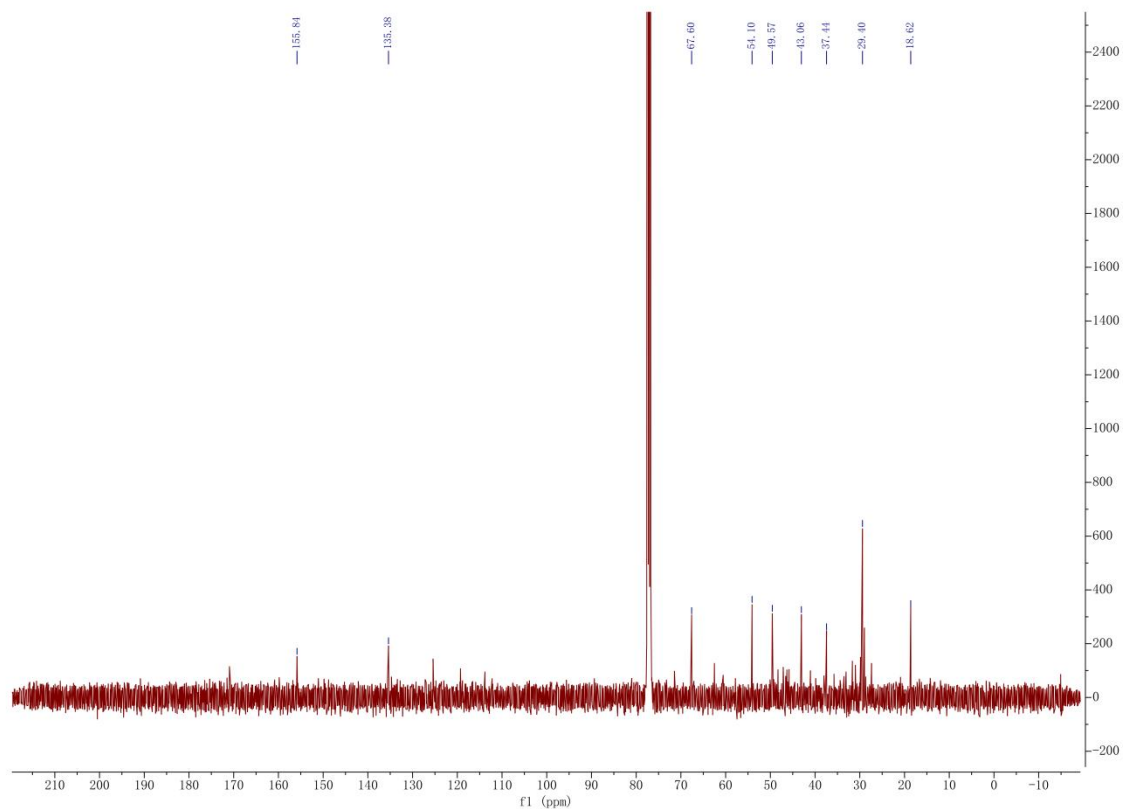

**Figure S80**  $^{13}\text{C}$  NMR spectrum (400 MHz) of compound **12** in Chloroform- $d$
